# Supplementary material for: Association of Gene Polymorphisms with Normal Tension Glaucoma: A Systematic Review and Meta-Analysis
Source: MDPI journal article supplement (doi:10.3390/genes15040491), 2024-04-14
Supplement: s1 [file Supplementary figures.pdf › Supplementary figures.pdf]

Figure S1. Associations between SNPs in *EDNRA* gene with NTG onset.

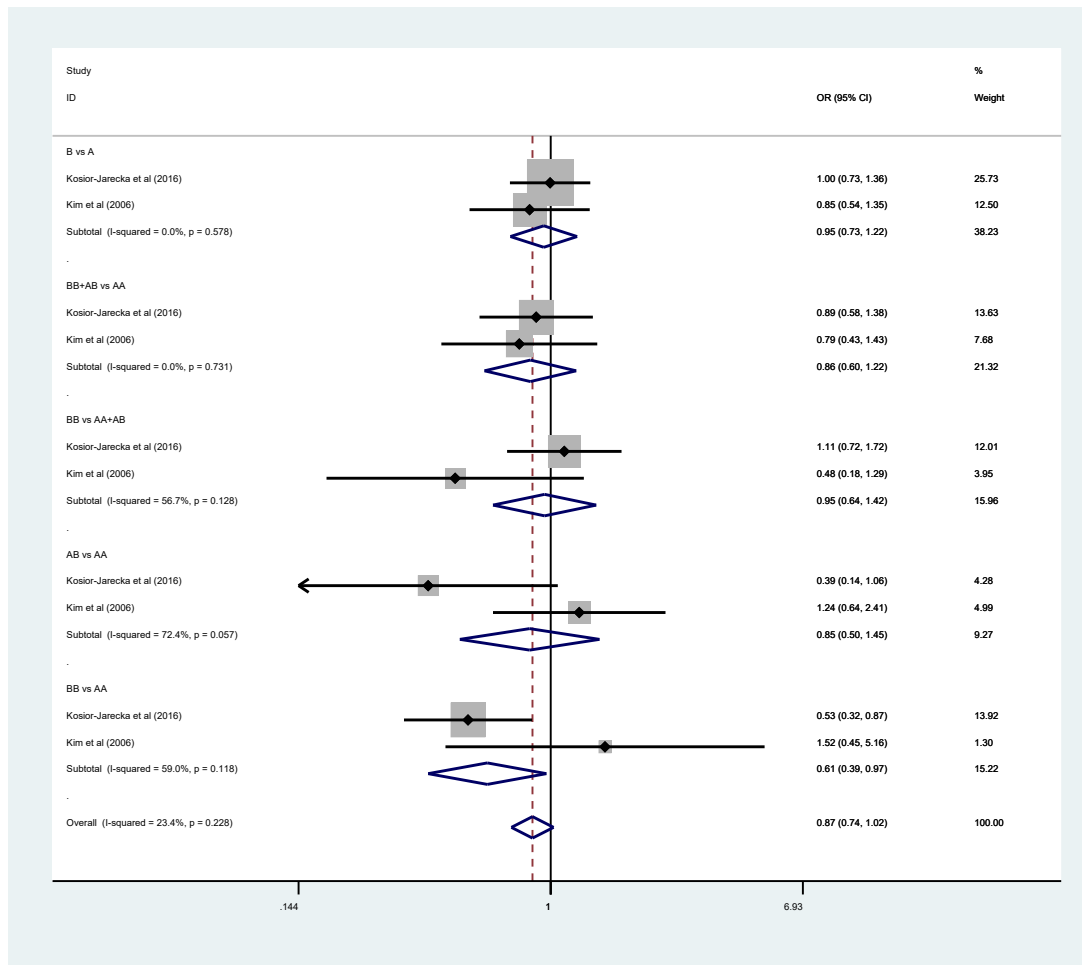

A) Forest plots exhibiting the association between *EDNRA* (c.-231G>A) and NTG in allele (B vs A), dominant (BB+AB vs AA), recessive (BB vs AA+AB) and co-dominant (AB vs AA & BB vs AA) models respectively.

OR: odds ratio; CI: confidence interval; NTG: normal tension glaucoma.

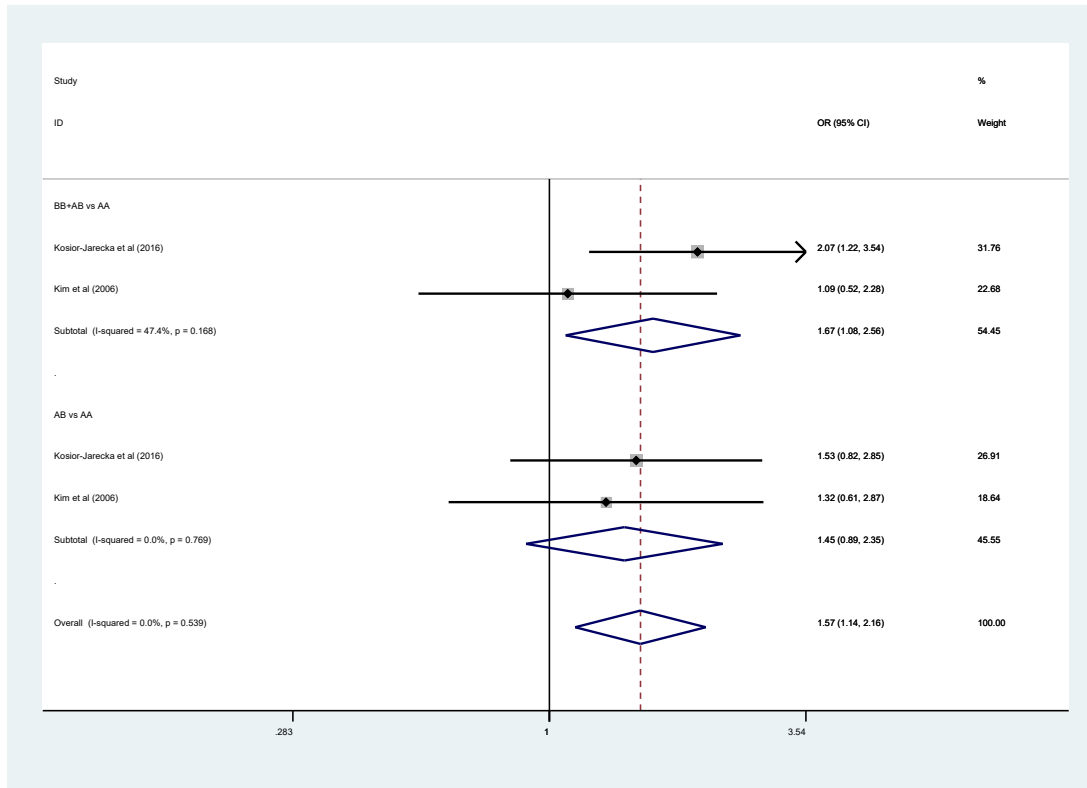

B) Forest plots exhibiting the association between *EDNRA* (c.\*70C>G) and NTG in dominant (BB+AB vs AA) and co-dominant (AB vs AA) models respectively (from fixed effects analysis). OR: odds ratio; CI: confidence interval; NTG: normal tension glaucoma.

Figure S2. Associations between SNPs in *ELOVL5* gene with NTG onset.

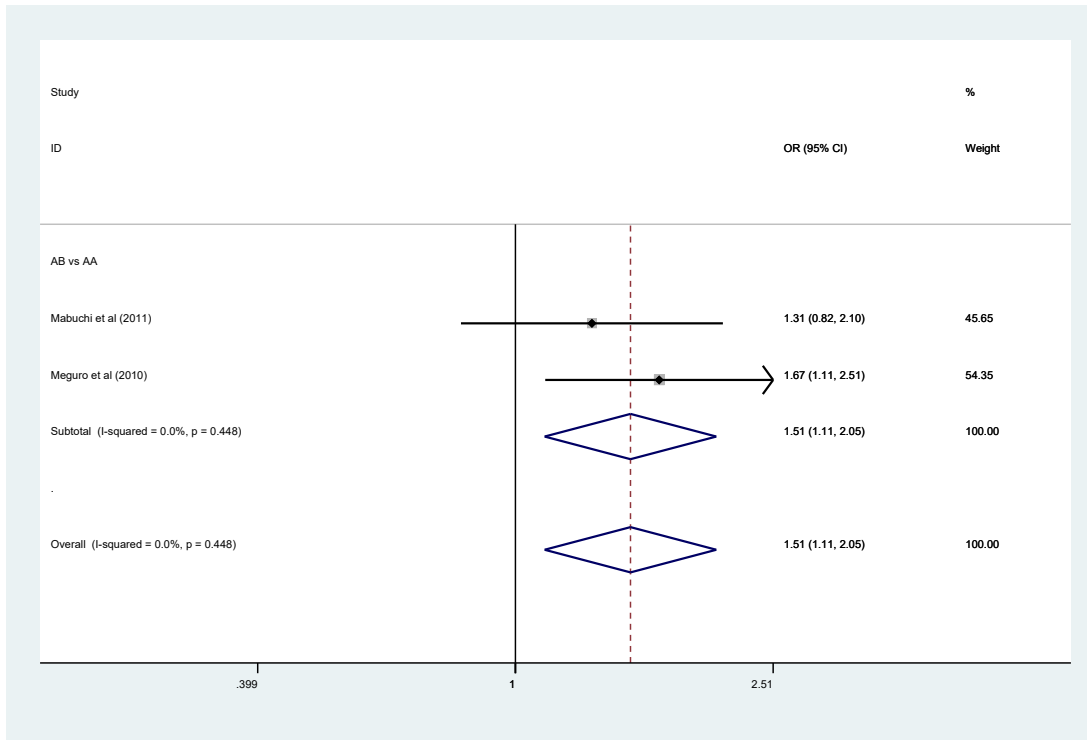

A) Forest plots demonstrating the association between *ELOVL5* (rs735860) and NTG in heterozygote model (AB vs AA).

OR: odds ratio; CI: confidence interval; NTG: normal tension glaucoma.

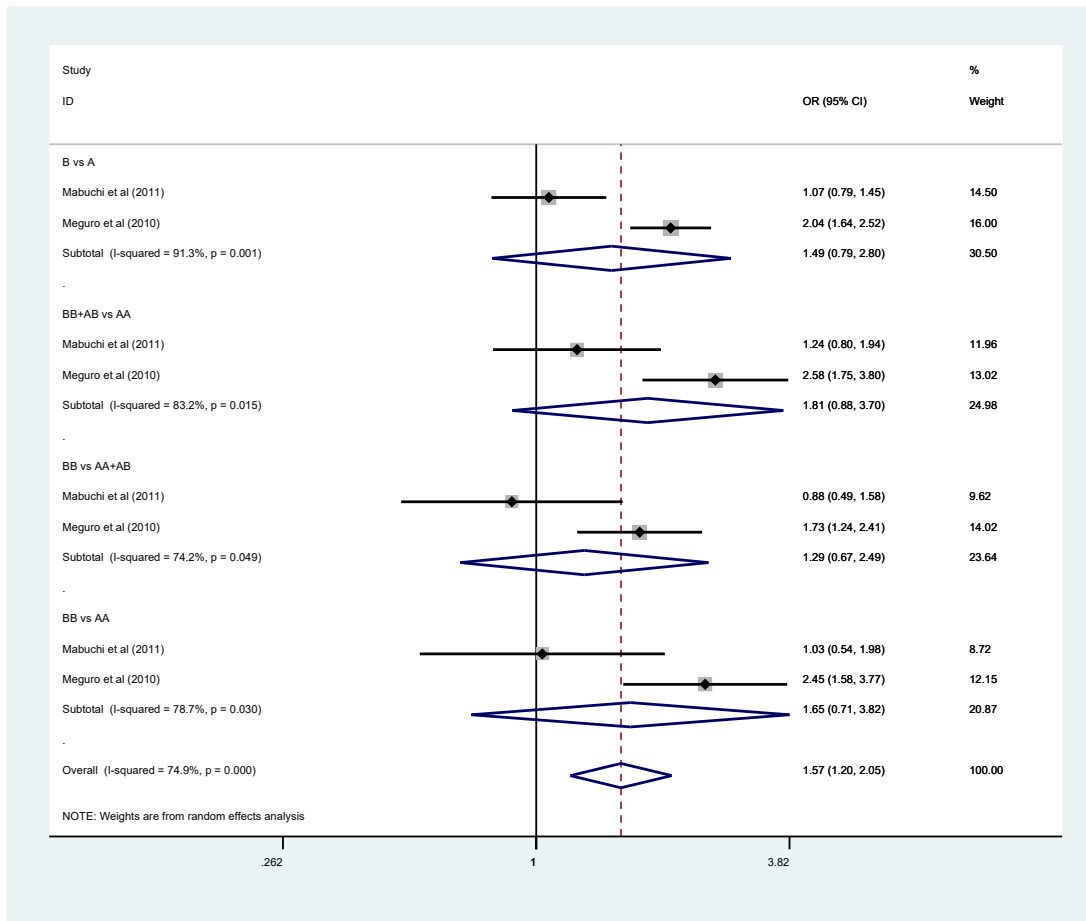

B) Forest plots demonstrating no association between *ELOVL5* (rs735860) and NTG in allele (B vs A), dominant (BB+AB vs AA), recessive (BB vs AA+AB) and homozygote (BB vs AA) models respectively (from random effects analysis).

OR: odds ratio; CI: confidence interval; NTG: normal tension glaucoma.

Figure S3. Associations between SNPs in *HK2* gene with NTG onset.

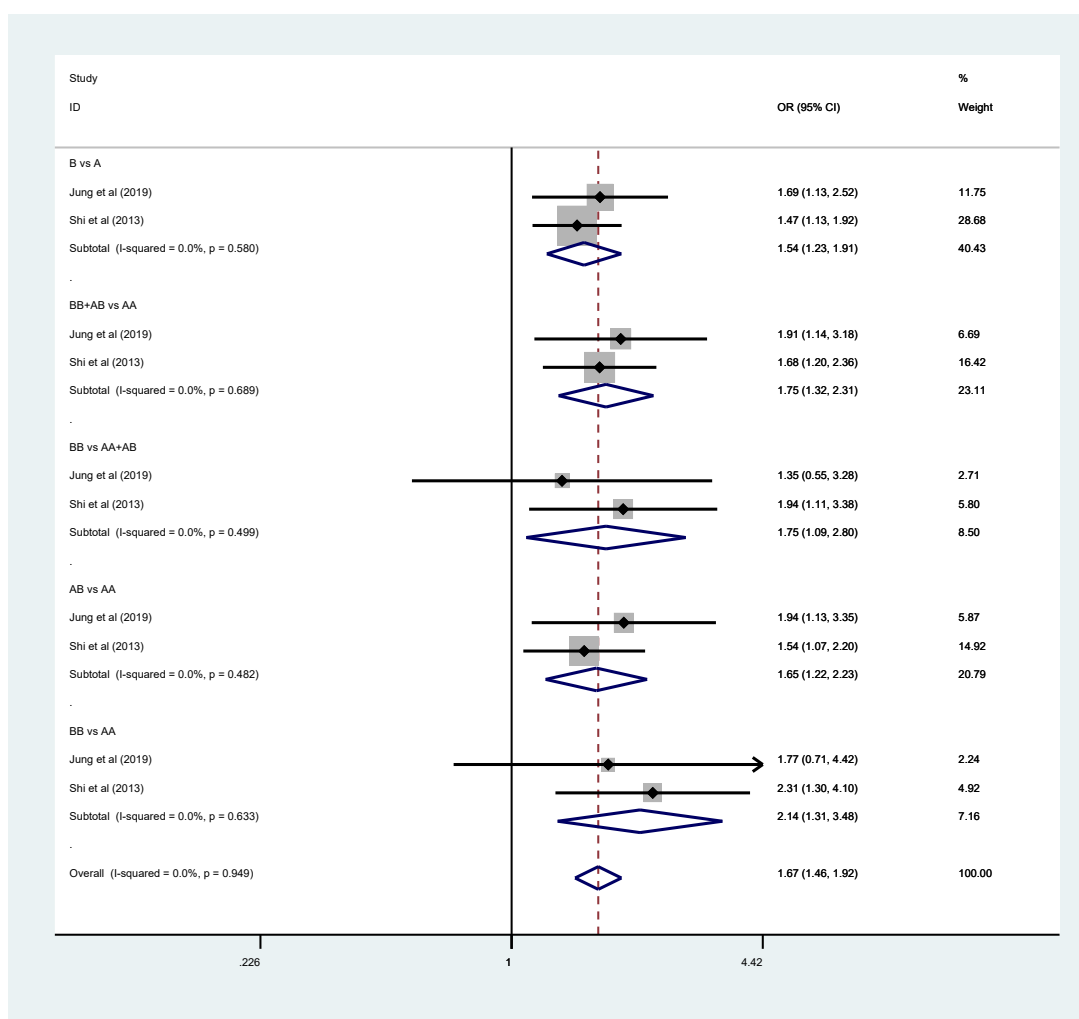

Forest plots demonstrating the association between *HK2* (rs678350) and NTG in allele (B vs A), dominant (BB+AB vs AA), recessive (BB vs AA+AB) and co-dominant (AB vs AA & BB vs AA) models respectively.

OR: odds ratio; CI: confidence interval; NTG: normal tension glaucoma.

Figure S4. Associations between SNPs in *NCK2* gene with NTG onset.

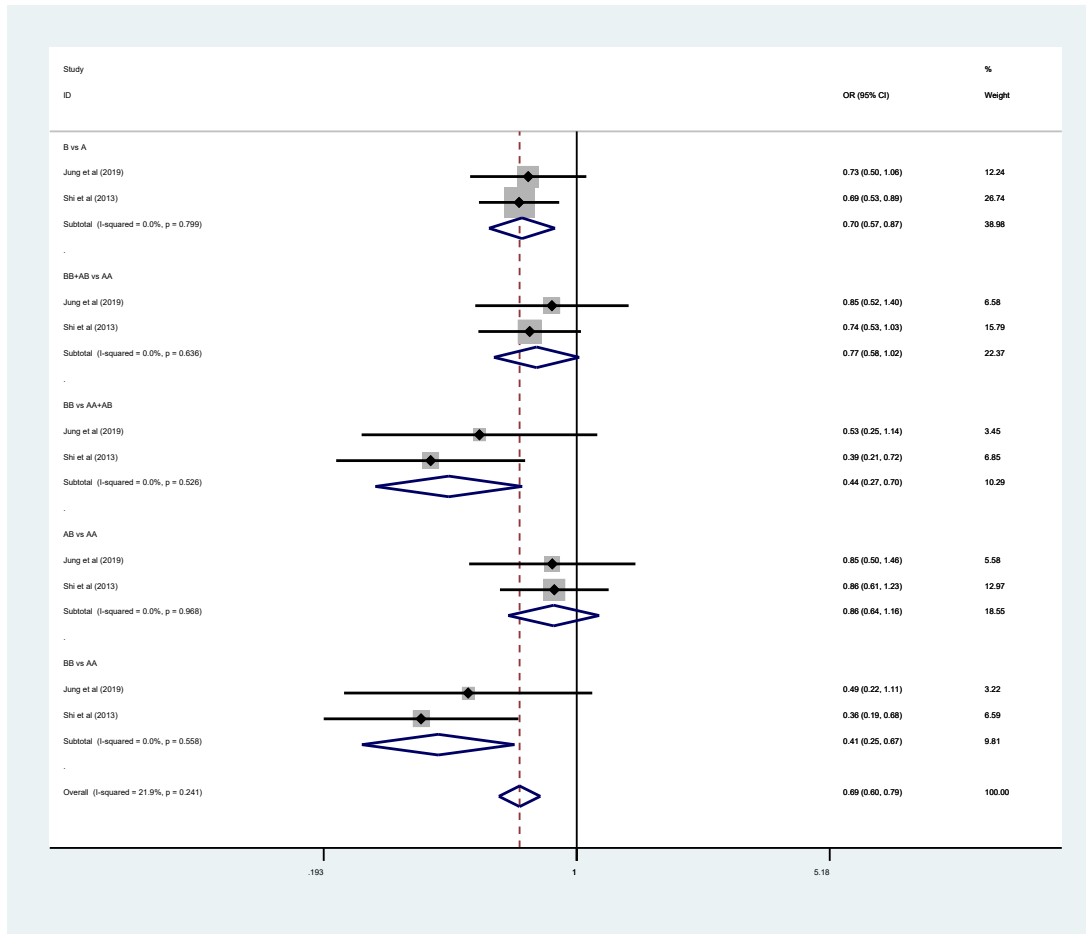

Forest plots demonstrating the association between *NCK2* (rs2033008) and NTG in allele (B vs A), dominant (BB+AB vs AA), recessive (BB vs AA+AB) and co-dominant (AB vs AA & BB vs AA) models respectively.

OR: odds ratio; CI: confidence interval; NTG: normal tension glaucoma.

Figure S5. Associations between SNPs in *OPAI* gene with NTG onset.

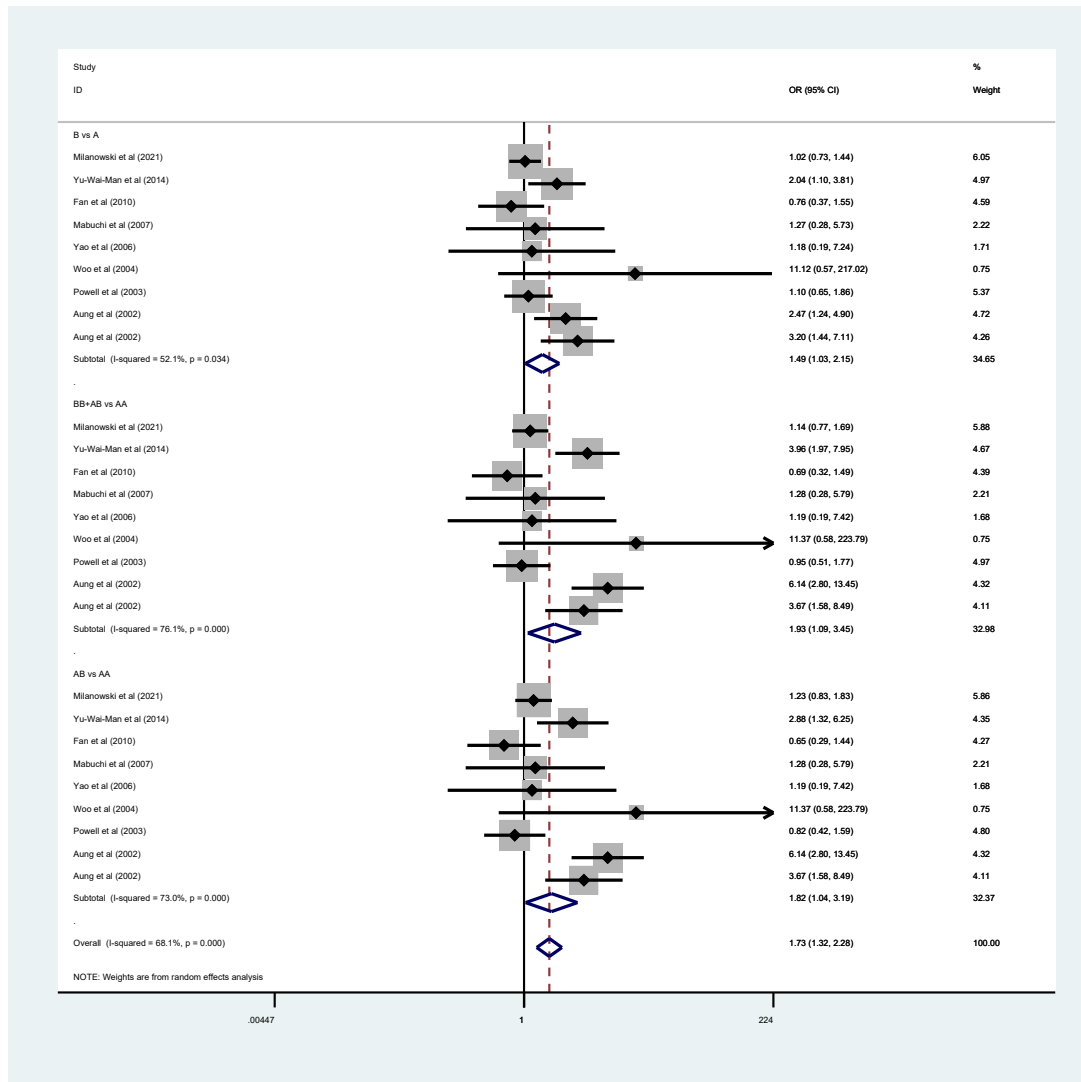

A) Forest plots demonstrating the association between *OPAI* (rs166850, IVS8+4C→T) and NTG in allele (B vs A), dominant (BB+AB vs AA) and heterozygote (AB vs AA) models respectively (from random effects analysis).

OR: odds ratio; CI: confidence interval; NTG: normal tension glaucoma.

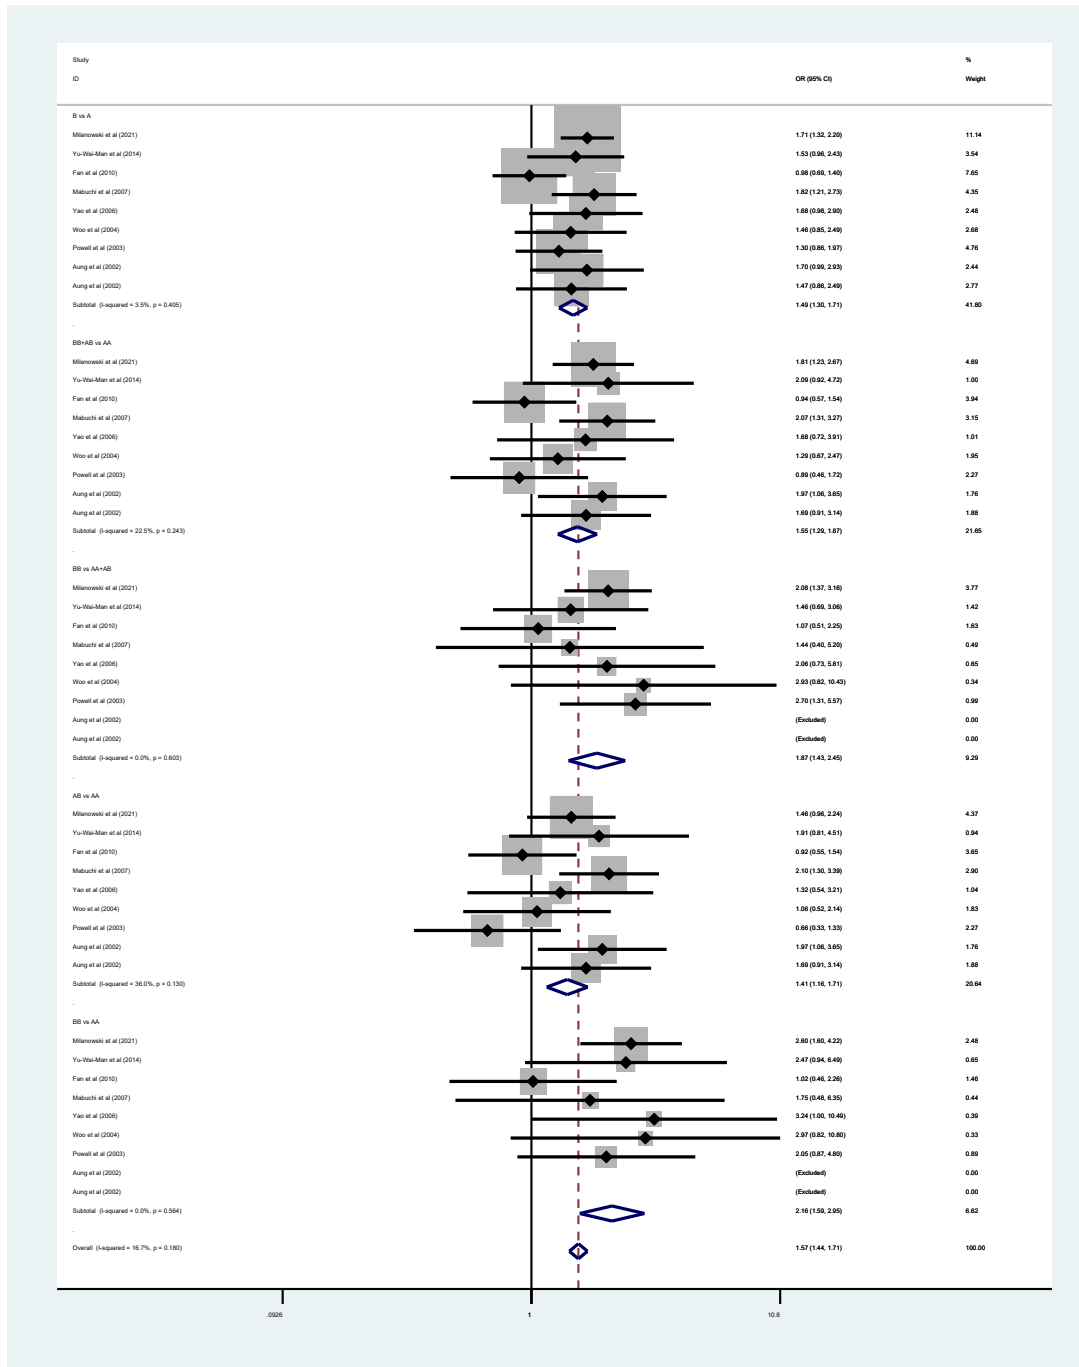

B) Forest plots demonstrating the association between *OPAL* (rs10451941, IVS8+32T→C) and NTG in allele (B vs A), dominant (BB+AB vs AA), recessive (BB vs AA+AB) heterozygote (AB vs AA) and homozygote (BB vs AA) models respectively. OR: odds ratio; CI: confidence interval; NTG: normal tension glaucoma.



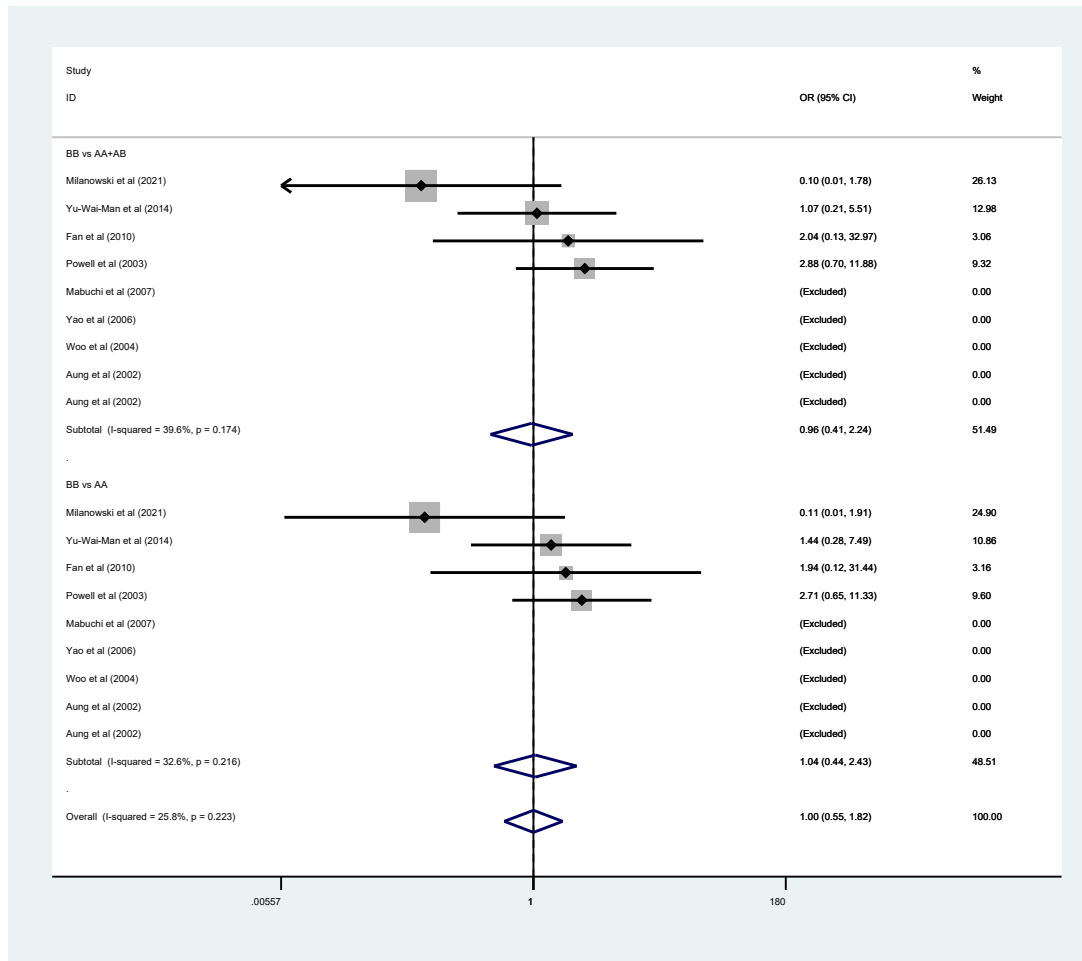

C) Forest plots demonstrating no association between *OPAT* (rs166850, IVS8+4C→T) and NTG in recessive (BB vs AA+AB) and homozygote (BB vs AA) models respectively (from fixed effects analysis).

OR: odds ratio; CI: confidence interval; NTG: normal tension glaucoma.

Figure S6. Associations between SNPs in *OPTN* gene with NTG onset.

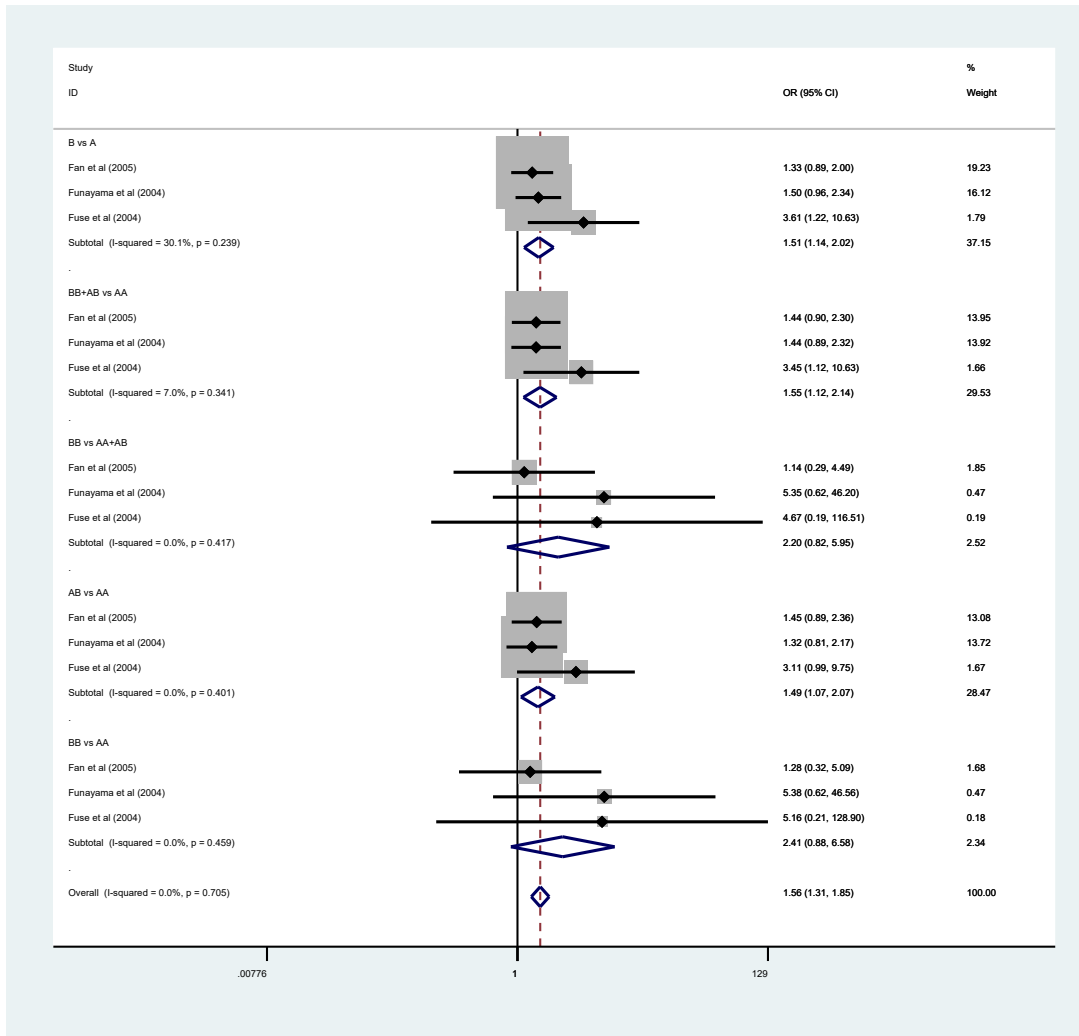

A) Forest plots demonstrating the association between *OPTN* (c.603T>A, Met98Lys) and NTG in allele (B vs A), dominant (BB+AB vs AA), recessive (BB vs AA+AB) and co-dominant (AB vs AA & BB vs AA) models respectively.

OR: odds ratio; CI: confidence interval; NTG: normal tension glaucoma.

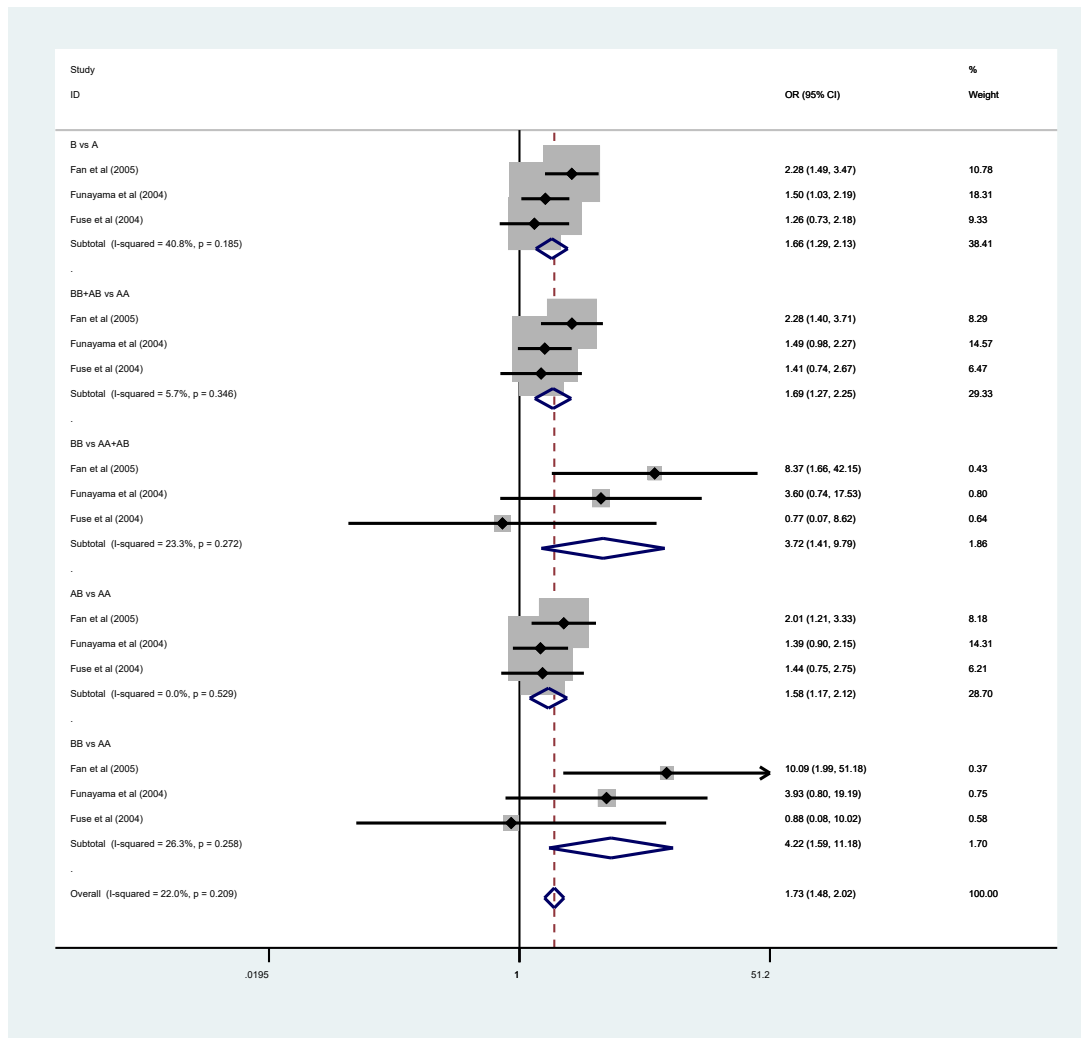

B) Forest plots demonstrating the association between *OPTN* (c.412G>A, Thr34Thr) and NTG in allele (B vs A), dominant (BB+AB vs AA), recessive (BB vs AA+AB) and co-dominant (AB vs AA & BB vs AA) models respectively.

OR: odds ratio; CI: confidence interval; NTG: normal tension glaucoma.

*IVS6-5T>C*

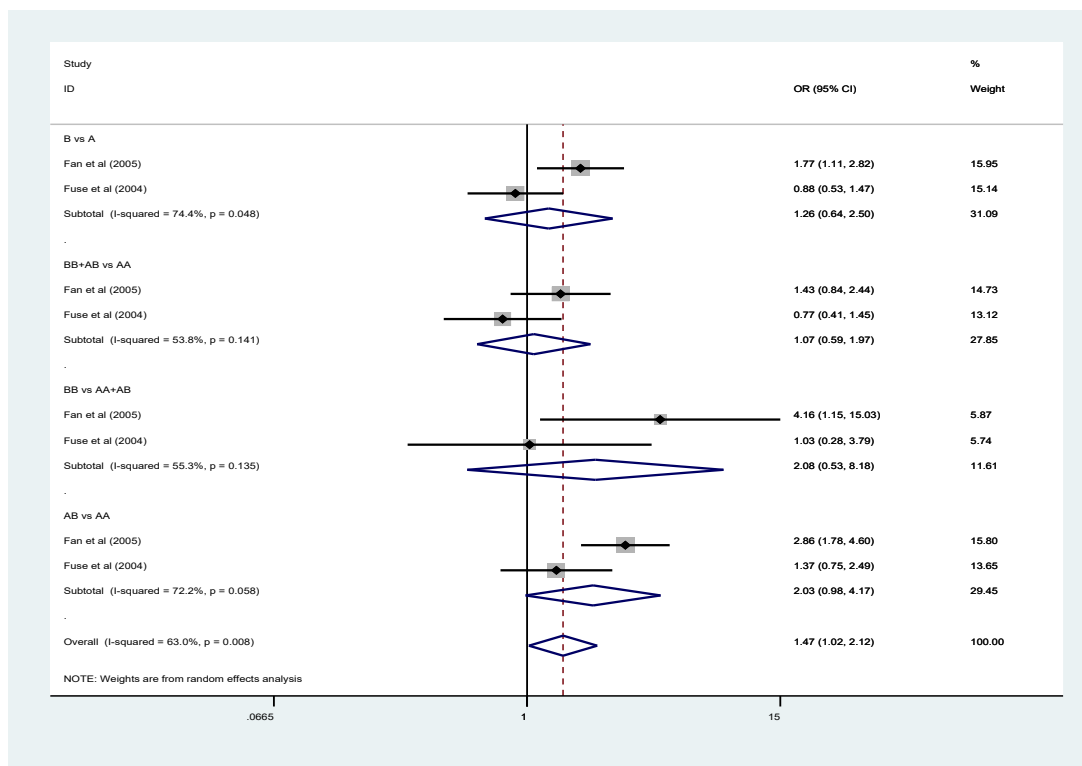

C) Forest plots demonstrating no association between *OPTN* (IVS6-5T>C) and NTG in allele (B vs A), dominant (BB+AB vs AA), recessive (BB vs AA+AB) or heterozygote (AB vs AA) models respectively (from random effects analysis).  
OR: odds ratio; CI: confidence interval; NTG: normal tension glaucoma.

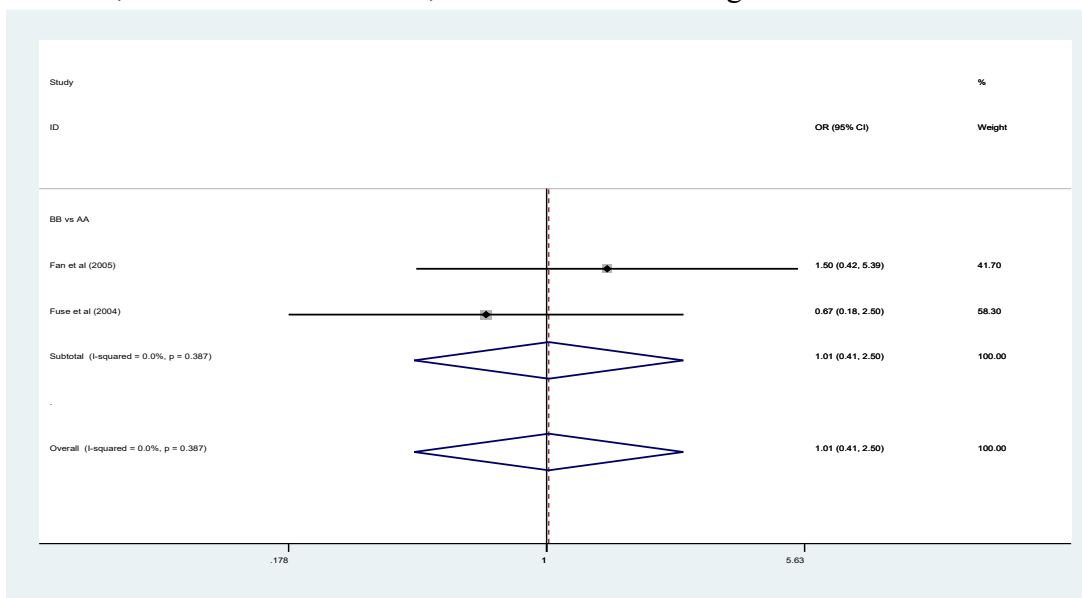

D) Forest plots demonstrating no association between *OPTN* (IVS6-5T>C) and NTG in homozygote (BB vs AA) model (from fixed effect analysis).  
OR: odds ratio; CI: confidence interval; NTG: normal tension glaucoma.

# *IVS6-10G>A*

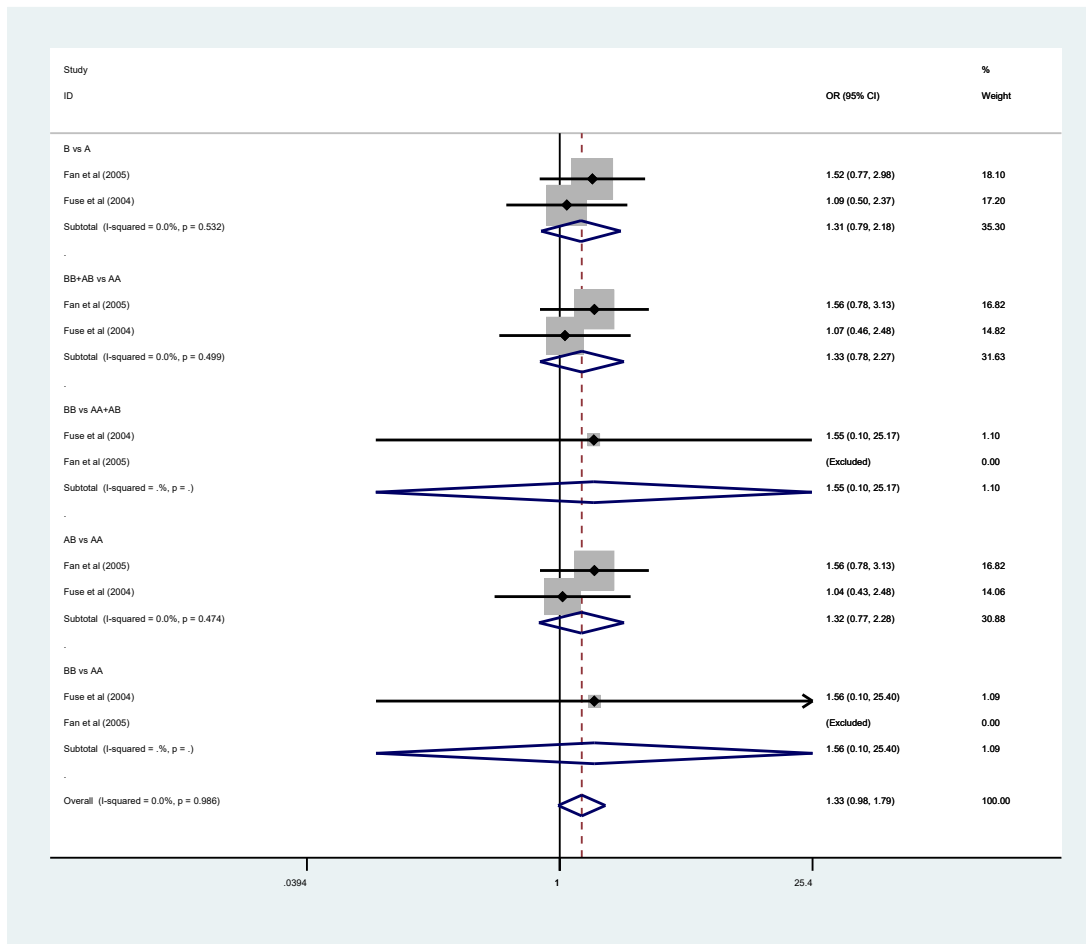

E) Forest plots demonstrating no association between *OPTN* (IVS6-10G>A) and NTG in allele (B vs A), dominant (BB+AB vs AA), recessive (BB vs AA+AB) or co-dominant (AB vs AA & BB vs AA) models respectively.

OR: odds ratio; CI: confidence interval; NTG: normal tension glaucoma.

*IVS7+24G>A*

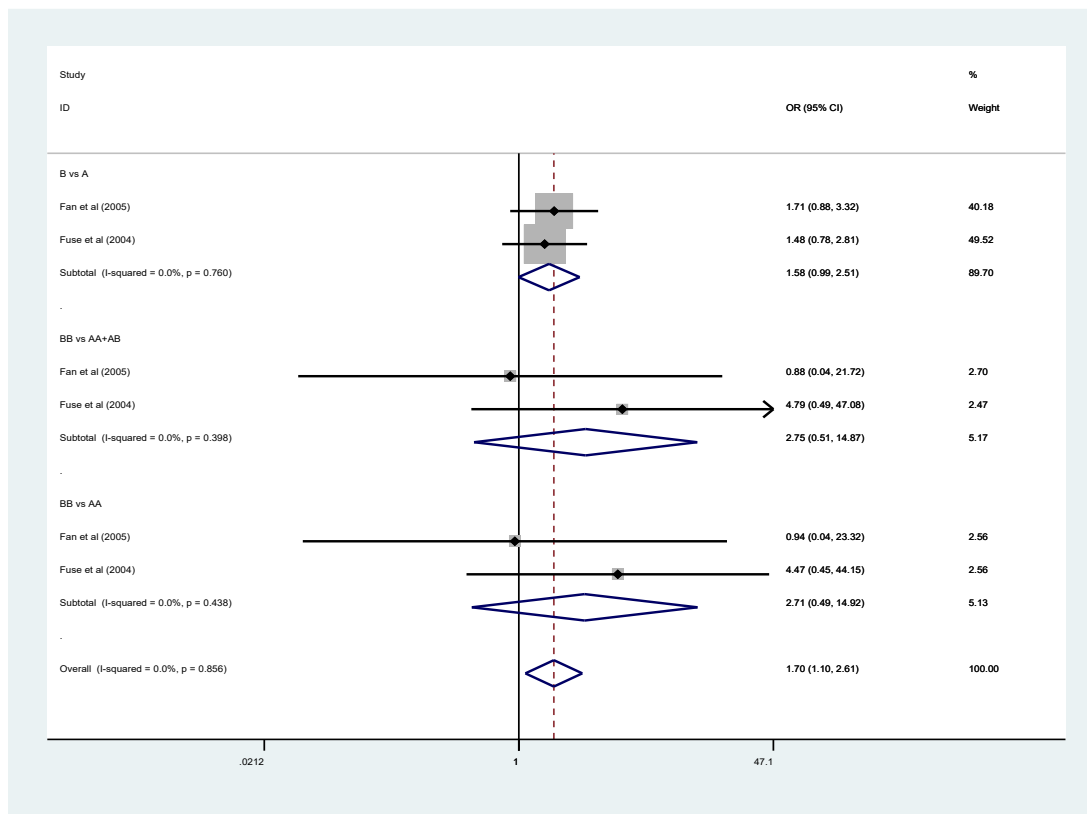

F) Forest plots demonstrating no association between *OPTN* (IVS7+24G>A) and NTG in allele (B vs A), recessive (BB vs AA+AB) or homozygote (BB vs AA) models (from fixed effects analysis). OR: odds ratio; CI: confidence interval; NTG: normal tension glaucoma.

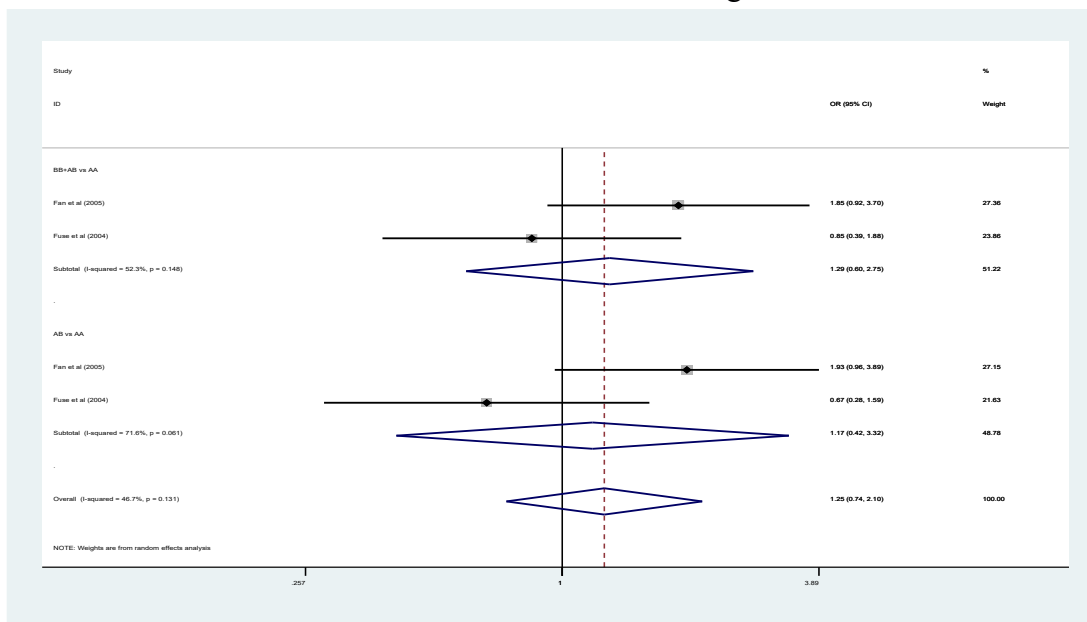

G) Forest plots demonstrating no association between *OPTN* (IVS7+24G>A) and NTG in dominant (BB+AB vs AA) or heterozygote (AB vs AA) models (from random effects analysis). OR: odds ratio; CI: confidence interval; NTG: normal tension glaucoma.

Figure S7. Associations between SNPs in *P53* gene with NTG onset.

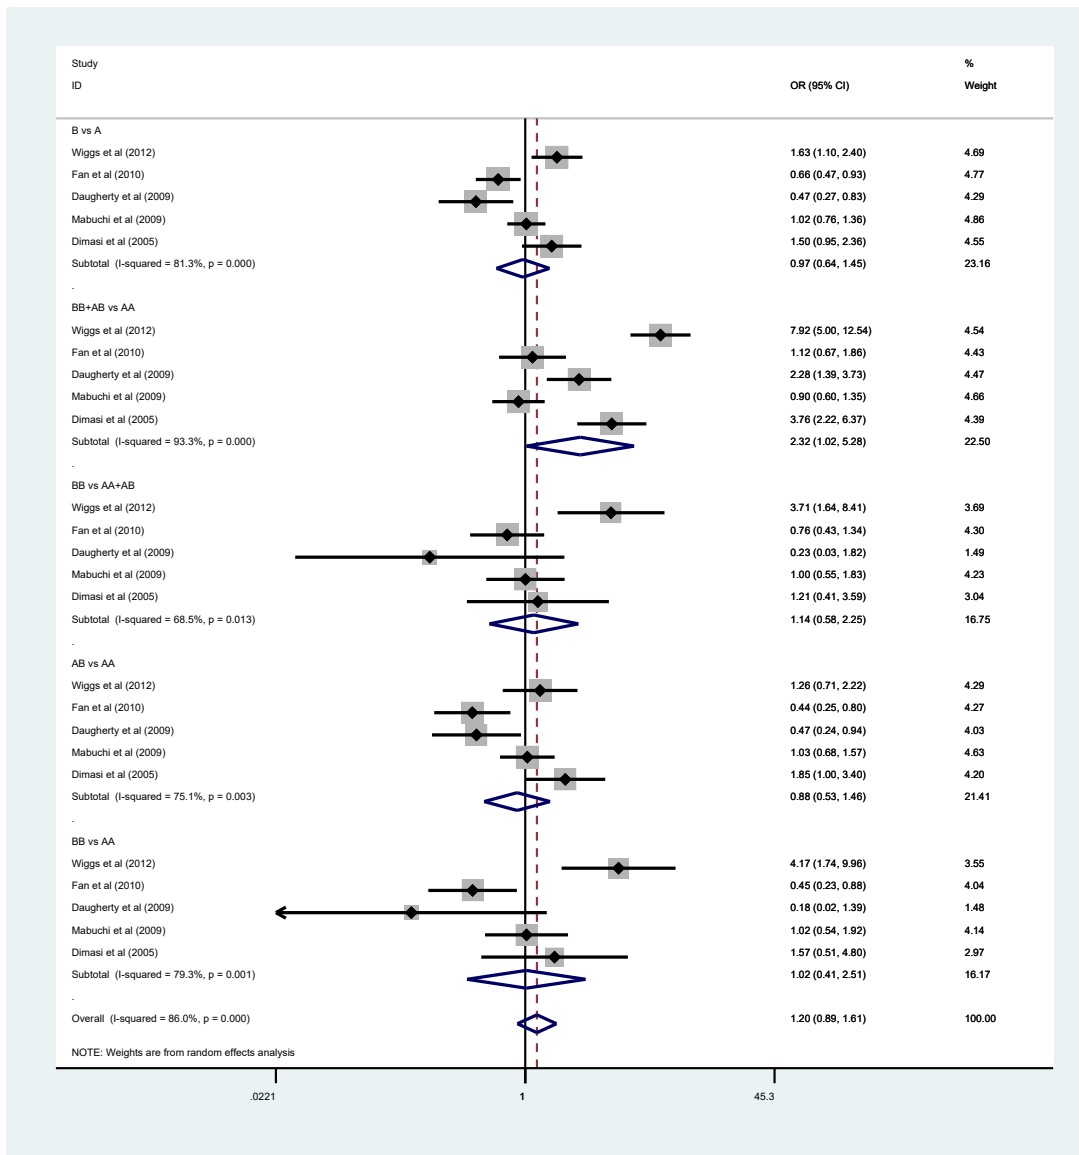

Forest plots demonstrating the association between *P53* (rs1042522) and NTG in allele (B vs A), dominant (BB+AB vs AA), recessive (BB vs AA+AB) and co-dominant (AB vs AA & BB vs AA) models respectively.

OR: odds ratio; CI: confidence interval; NTG: normal tension glaucoma.

Figure S8. Associations between SNPs in *SRBD1* gene with NTG onset.

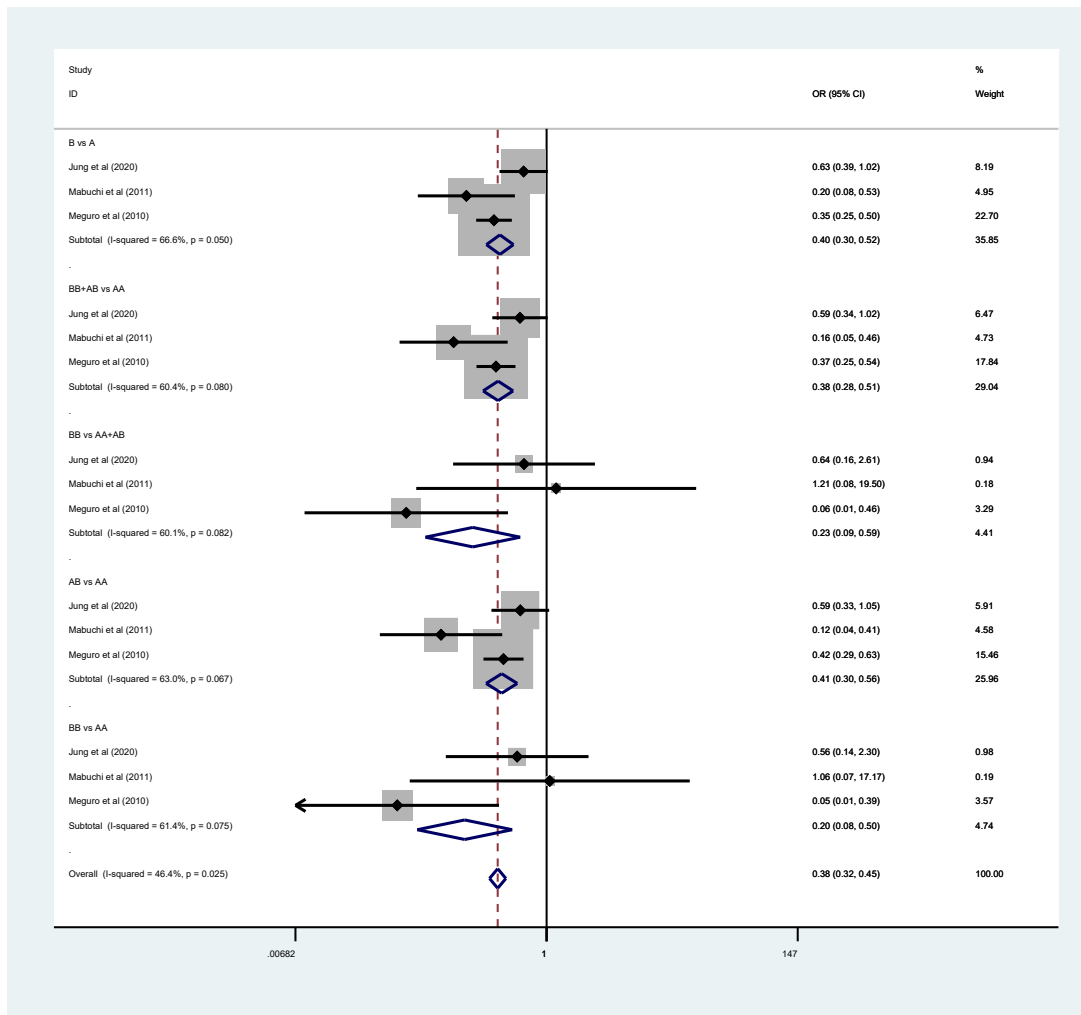

Forest plots demonstrating the association between *SRBD1* (rs3213787) and NTG in allele (B vs A), dominant (BB+AB vs AA), recessive (BB vs AA+AB) and co-dominant (AB vs AA & BB vs AA) models respectively.

OR: odds ratio; CI: confidence interval; NTG: normal tension glaucoma.



Figure S9. Associations between SNPs in *TLR4* gene with NTG onset.

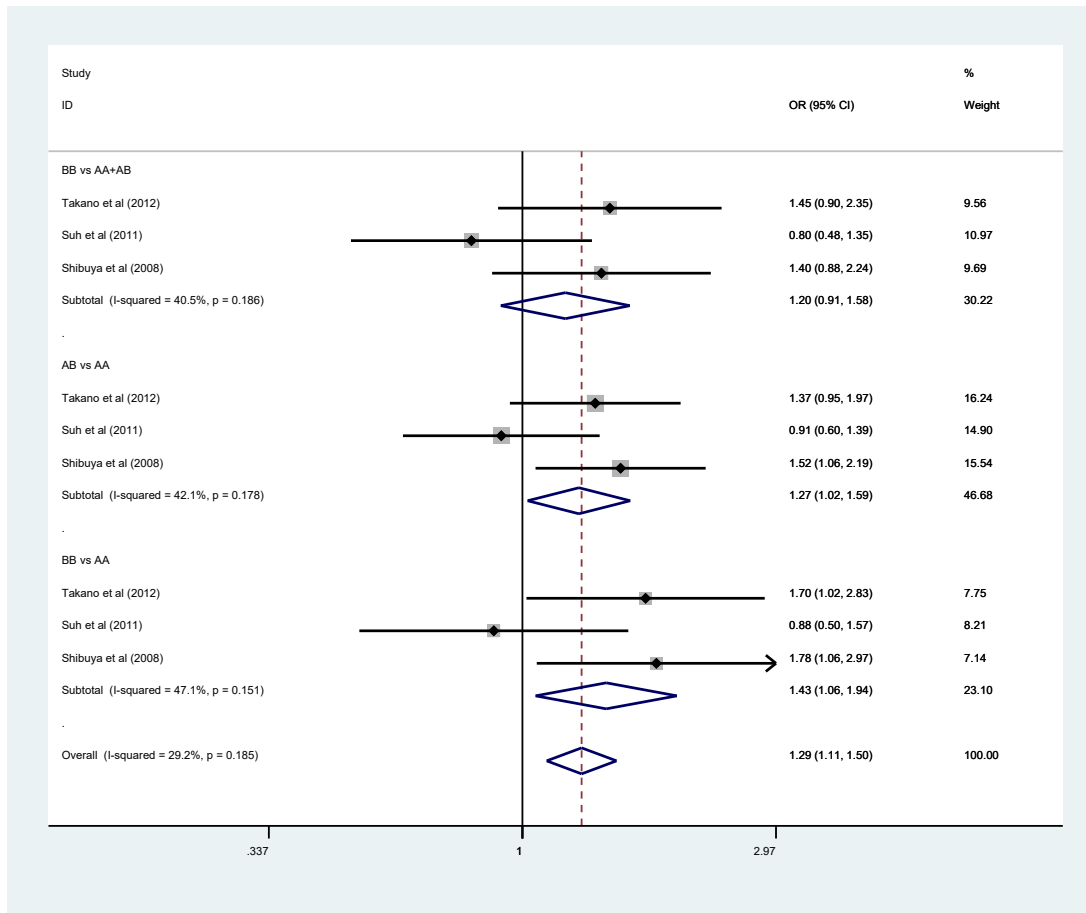

A) Forest plots demonstrating the association between *TLR4* (rs10759930) and NTG in heterozygote (AB vs AA) and homozygote (BB vs AA) models (from fixed effects analysis). OR: odds ratio; CI: confidence interval; NTG: normal tension glaucoma.

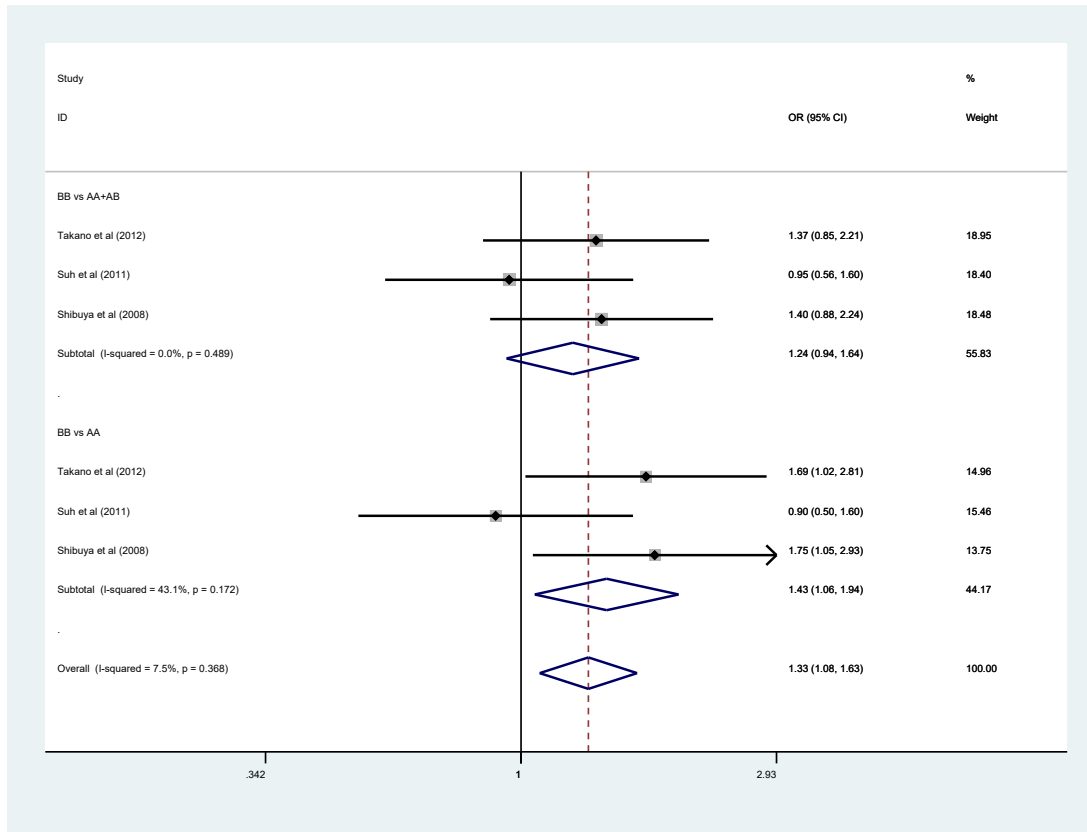

B) Forest plots demonstrating the association between TLR4 (rs1927914) and NTG in homozygote (BB vs AA) model (from fixed effects analysis).  
OR: odds ratio; CI: confidence interval; NTG: normal tension glaucoma.

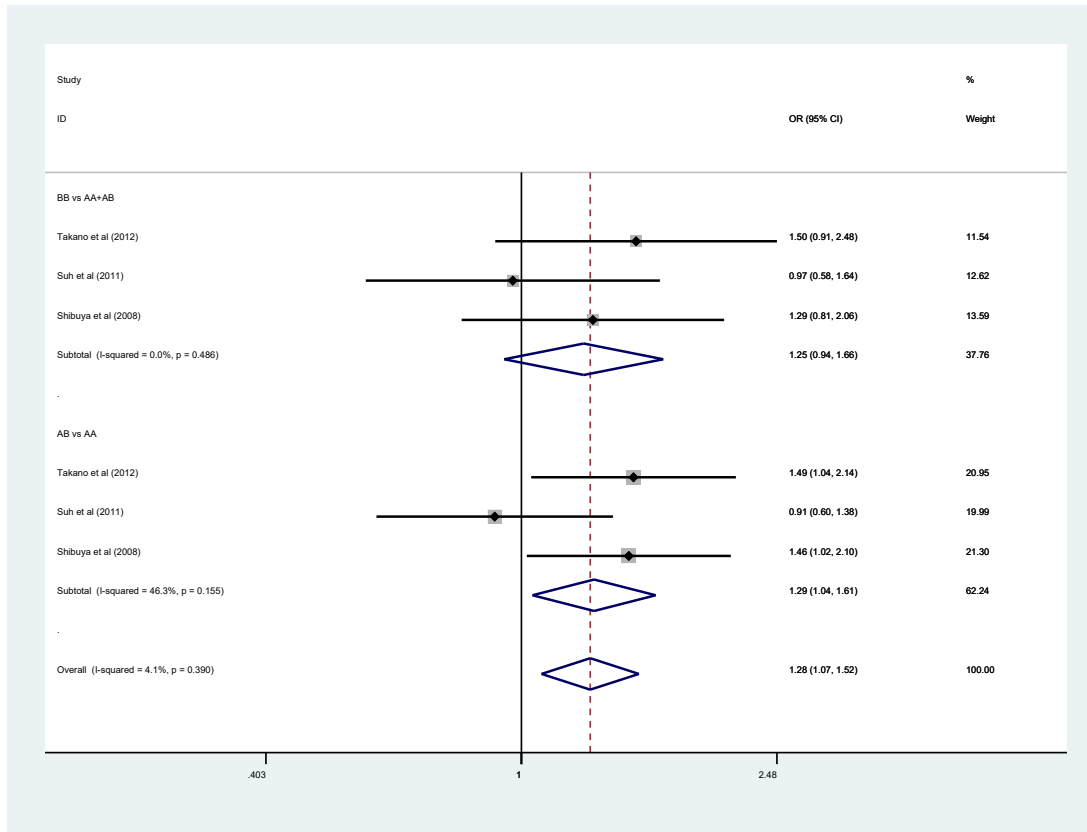

C) Forest plots demonstrating the association between TLR4 (rs1927911) and NTG in heterozygote (AB vs AA) model (from fixed effects analysis).  
OR: odds ratio; CI: confidence interval; NTG: normal tension glaucoma.

rs12377632

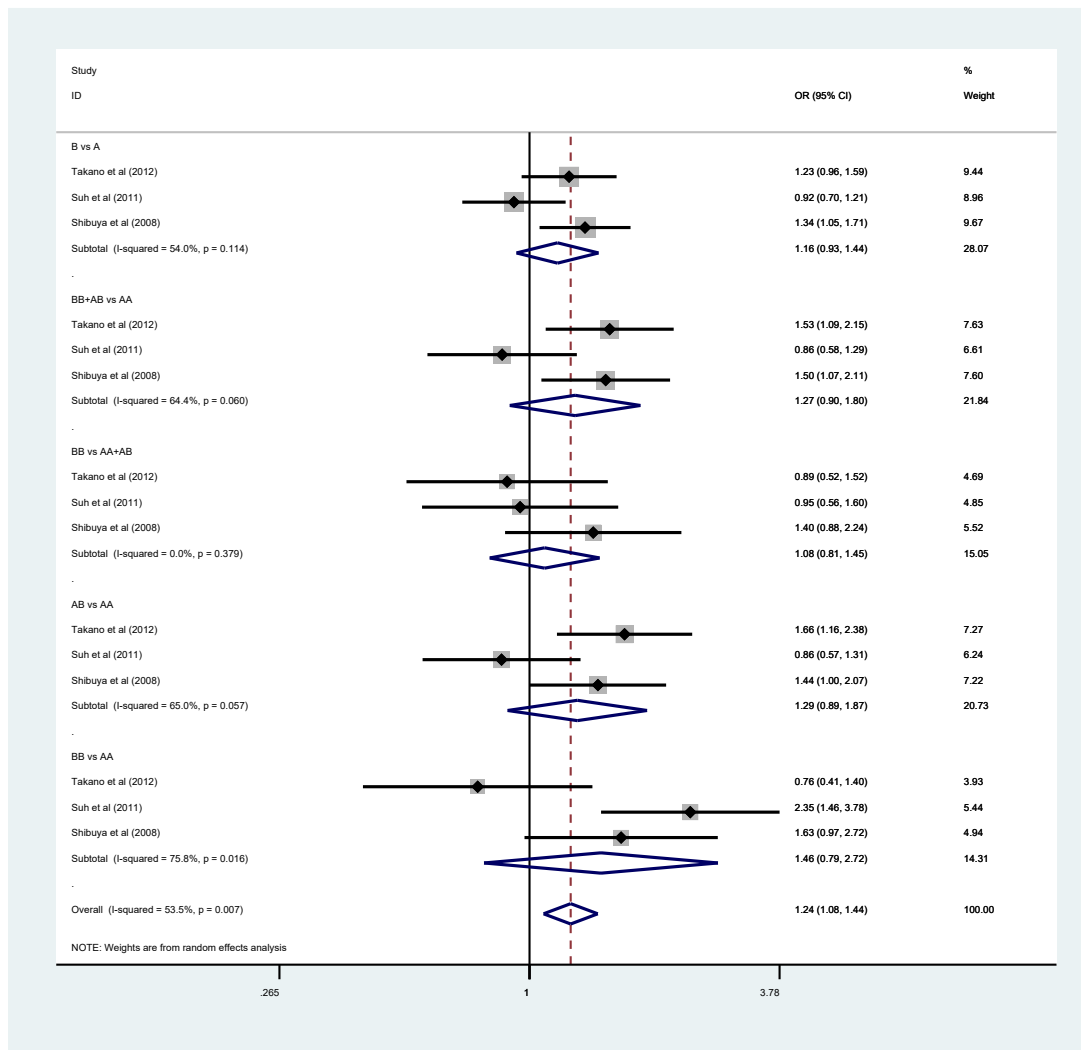

D) Forest plots demonstrating no association between *TLR4* (rs12377632) and NTG in allele (B vs A), dominant (BB+AB vs AA), recessive (BB vs AA+AB) or co-dominant (AB vs AA & BB vs AA) models respectively.

OR: odds ratio; CI: confidence interval; NTG: normal tension glaucoma.

rs2149356

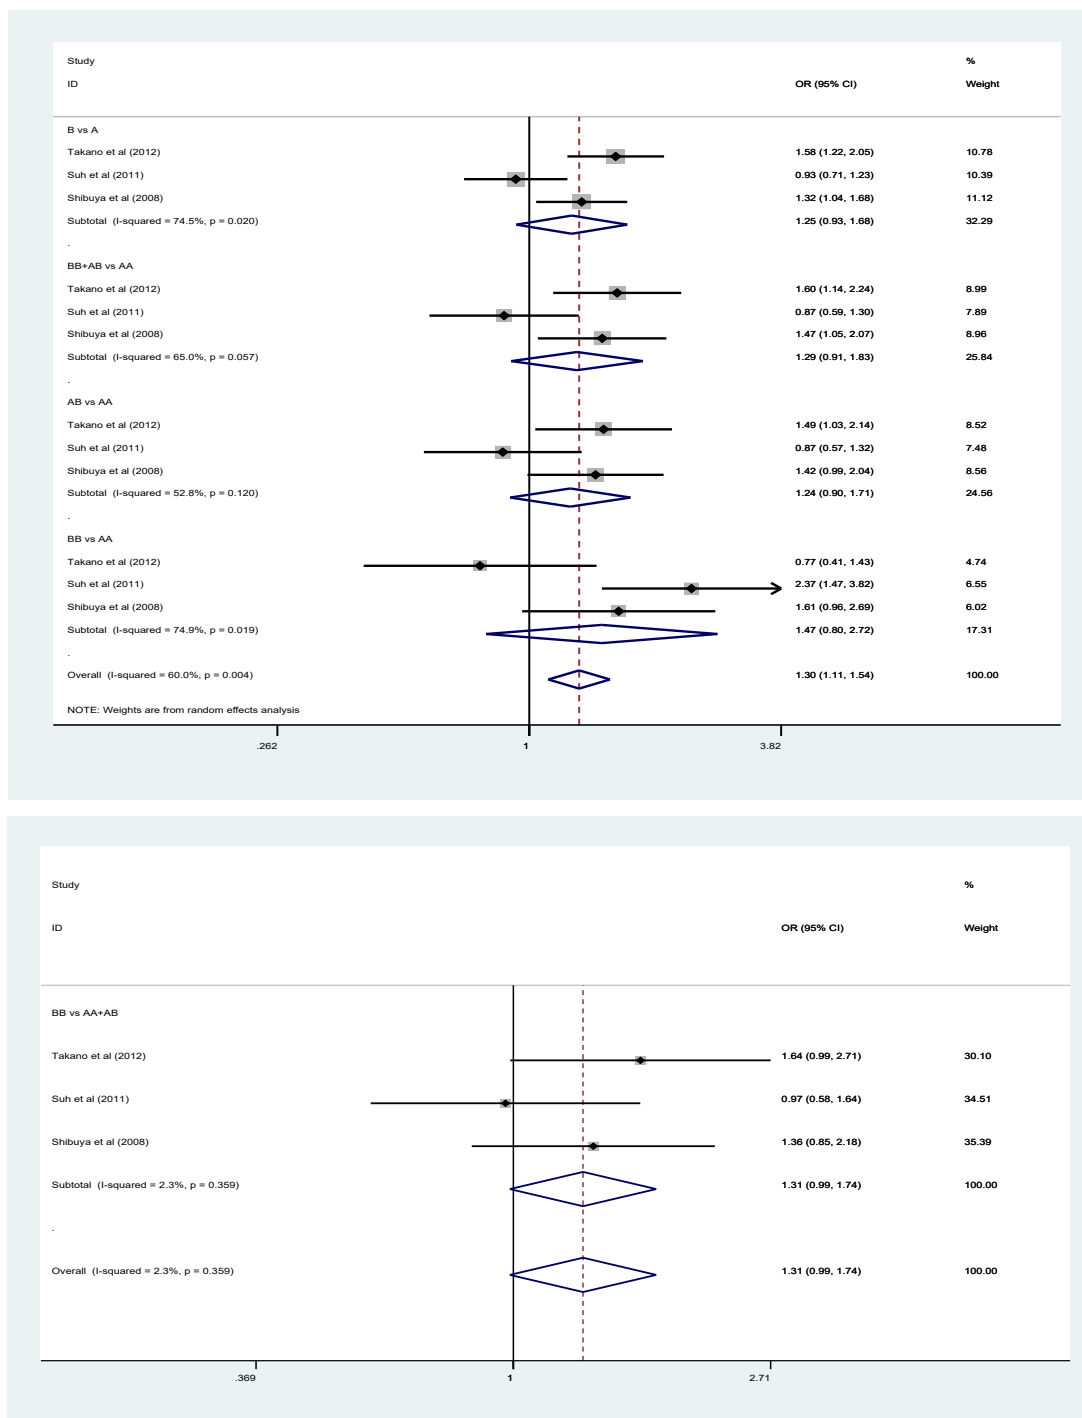

E) Forest plots demonstrating no association between *TLR4* (rs2149356) and NTG in allele (B vs A), dominant (BB+AB vs AA), heterozygote (AB vs AA), homozygote (BB vs AA) models (from random effects analysis), or recessive (BB vs AA+AB) model (from fixed effects analysis). OR: odds ratio; CI: confidence interval; NTG: normal tension glaucoma.

rs11536889

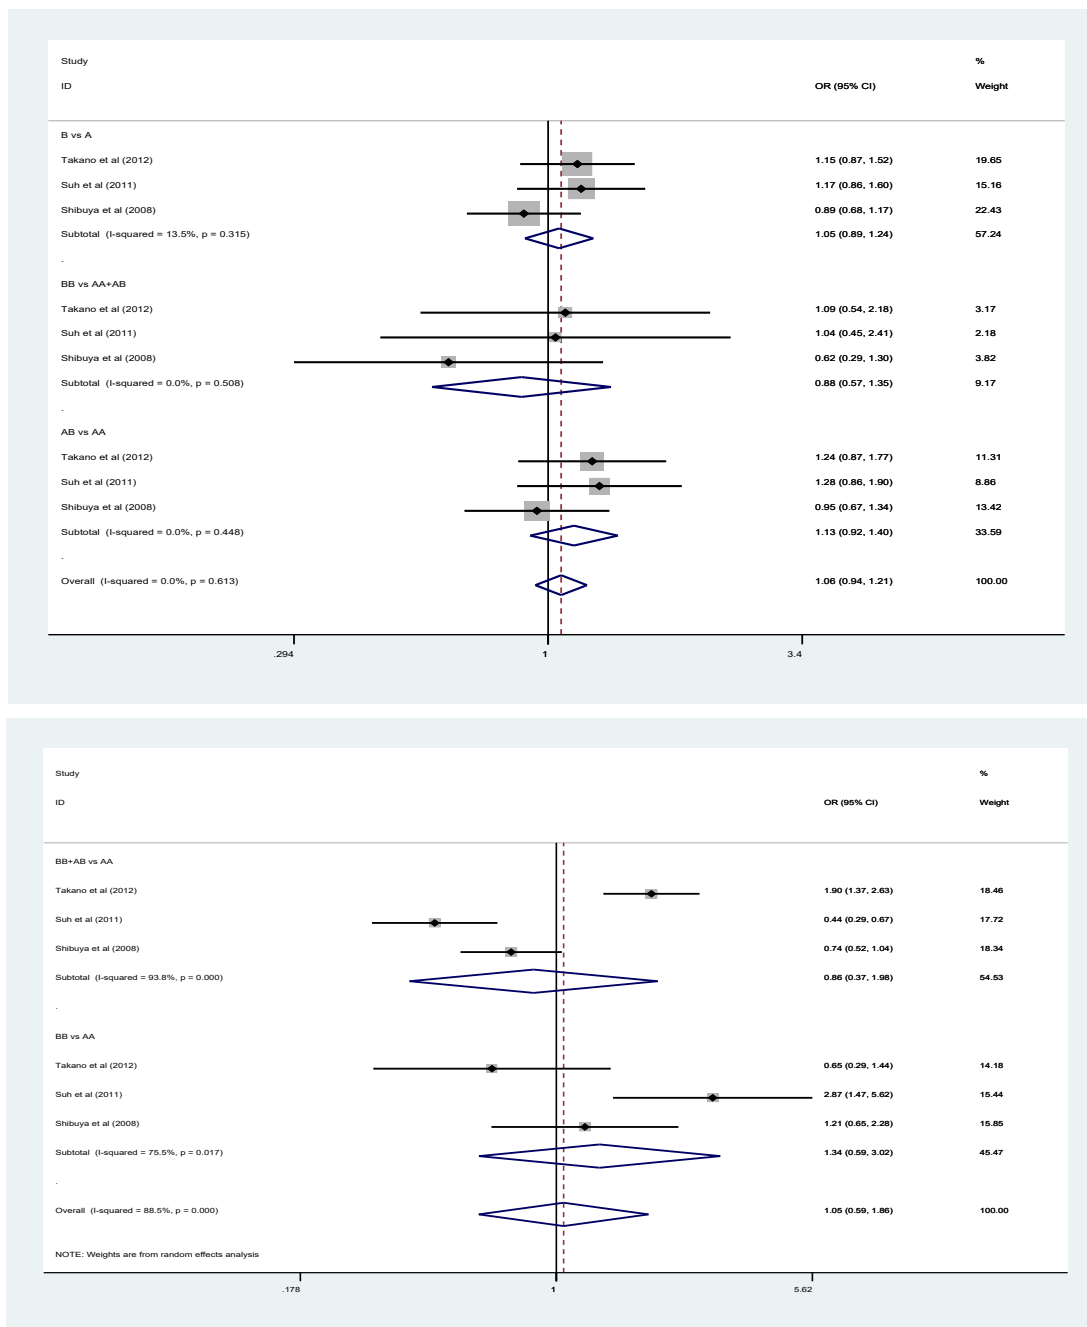

F) Forest plots demonstrating no association between *TLR4* (rs11536889) and NTG in allele (B vs A), recessive (BB vs AA+AB), heterozygote (AB vs AA) models (from fixed effects analysis), or dominant (BB+AB vs AA), homozygote (BB vs AA) models (from random effects analysis). OR: odds ratio; CI: confidence interval; NTG: normal tension glaucoma.

rs7037117

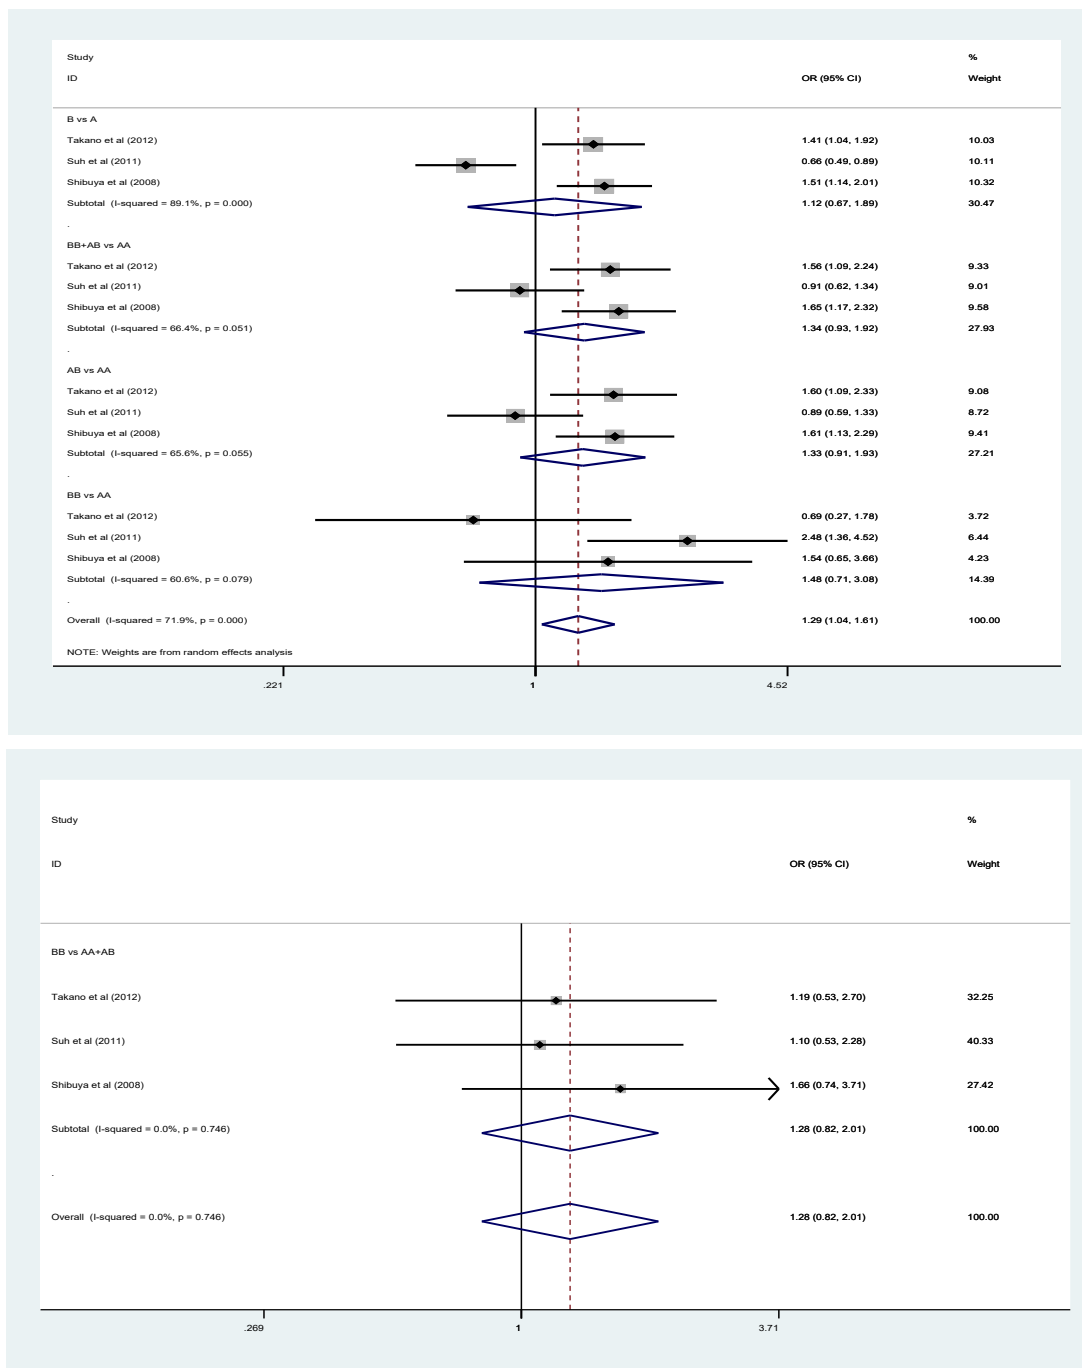

G) Forest plots demonstrating no association between *TLR4* (rs7037117) and NTG in allele (B vs A), dominant (BB+AB vs AA), heterozygote (AB vs AA), homozygote (BB vs AA) models (from random effects analysis), or recessive (BB vs AA+AB) model (from fixed effects analysis). OR: odds ratio; CI: confidence interval; NTG: normal tension glaucoma.

rs7045953

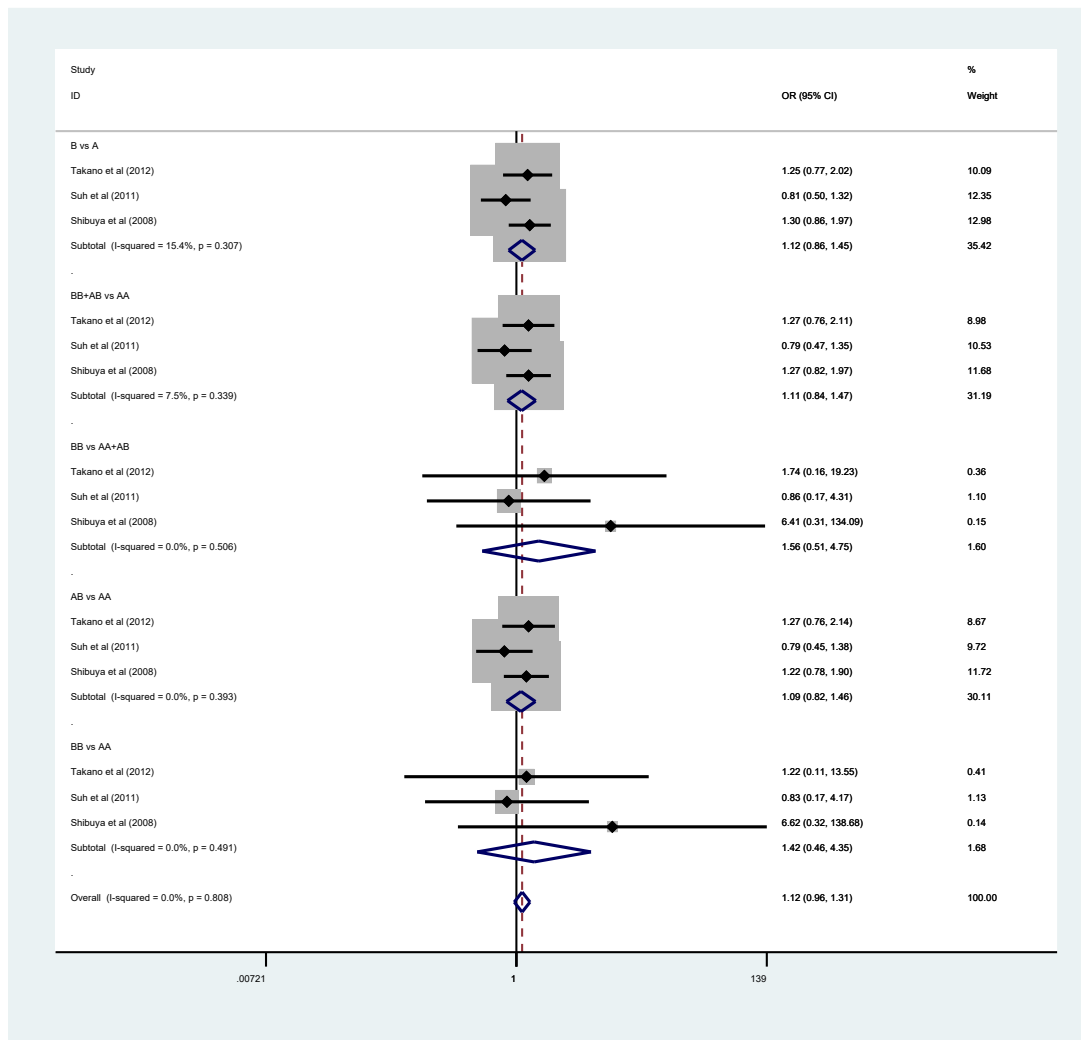

H) Forest plots demonstrating no association between *TLR4* (rs7045953) and NTG in allele (B vs A), dominant (BB+AB vs AA), recessive (BB vs AA+AB) or co-dominant (AB vs AA & BB vs AA) models respectively.

OR: odds ratio; CI: confidence interval; NTG: normal tension glaucoma.



Figure S10. Associations between SNPs in *SIX1-SIX6* gene with NTG onset.

rs10483727

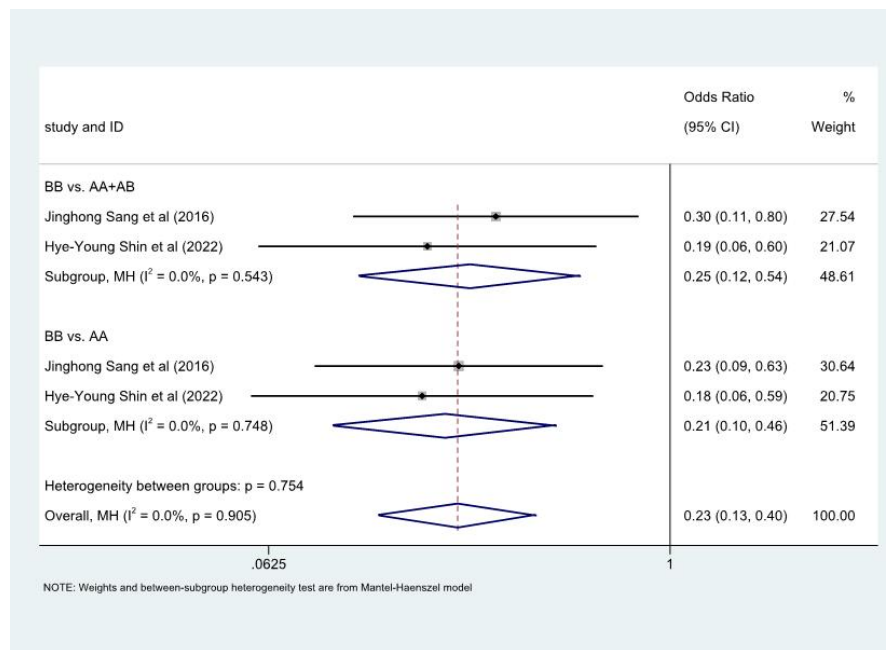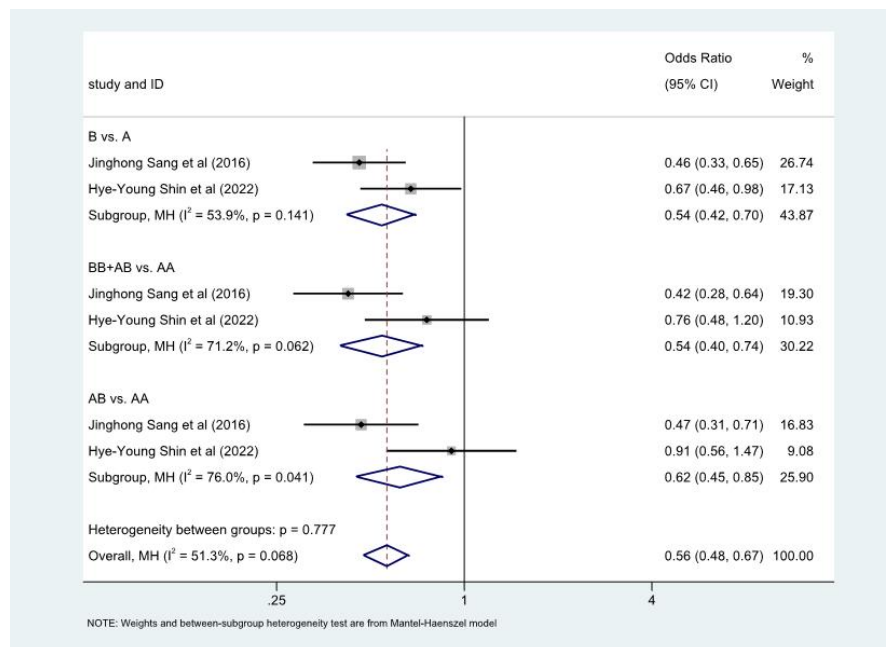

A) Forest plots exhibiting the association between *SIX1-SIX6* (rs10483727) and NTG in all models from fixed or random effects analysis respectively.

OR: odds ratio; CI: confidence interval; NTG: normal tension glaucoma.

rs33912345

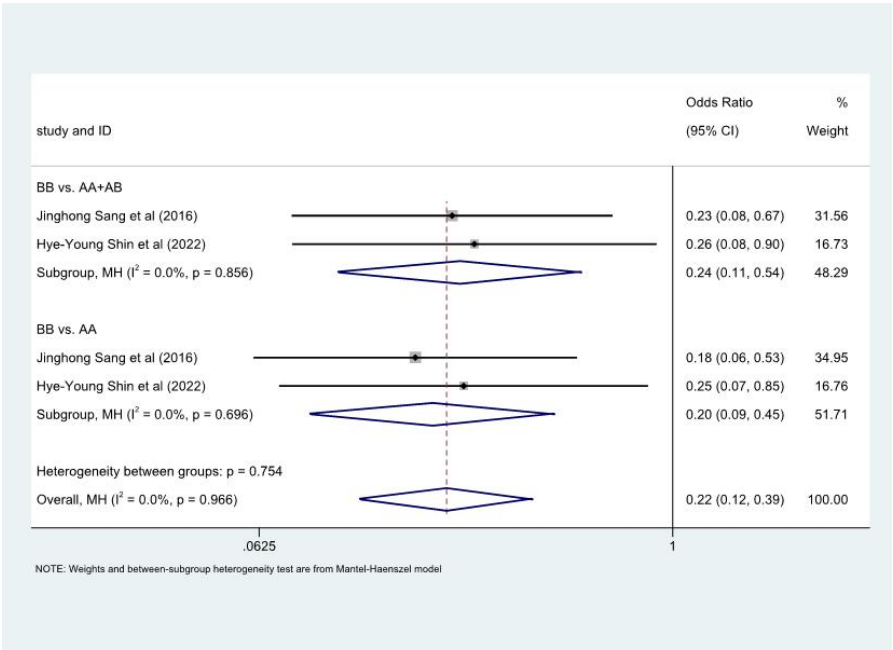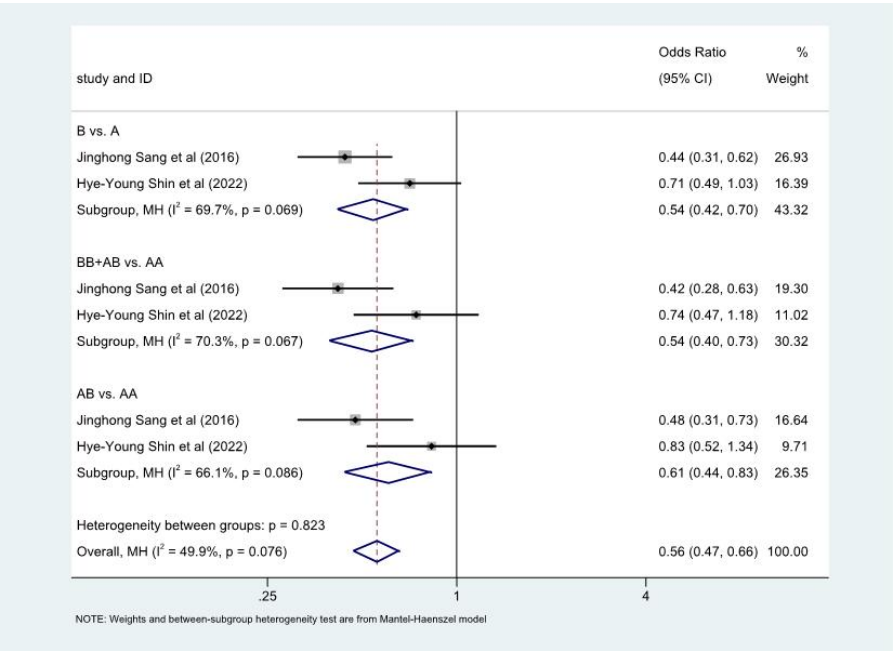

B) Forest plots exhibiting the association between *SIX1-SIX6* (rs33912345) and NTG in all models from fixed or random effects analysis respectively.

OR: odds ratio; CI: confidence interval; NTG: normal tension glaucoma.

Figure S11. Sensitivity analysis for rs7037117 in *TLR4* gene.

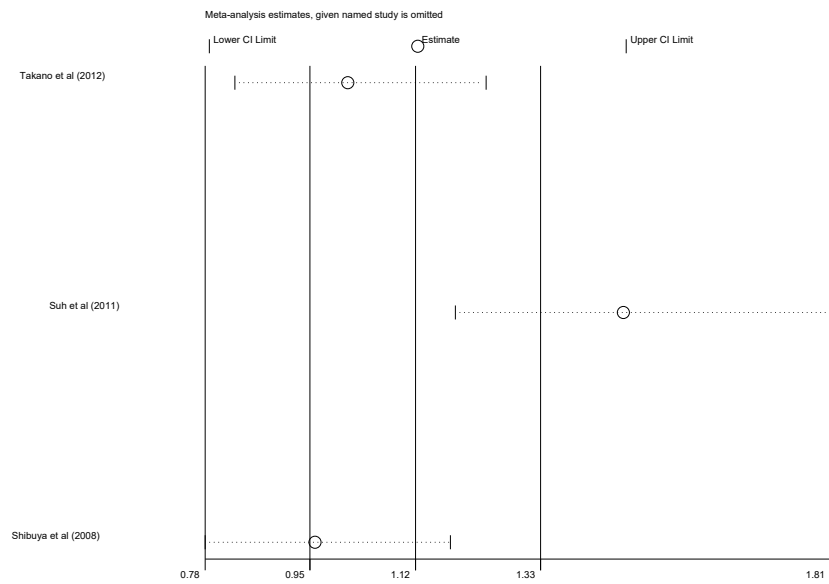

In the sensitivity analysis, the confidence interval of Suh's study was beyond the upper limit so that it was excluded for next calculation.

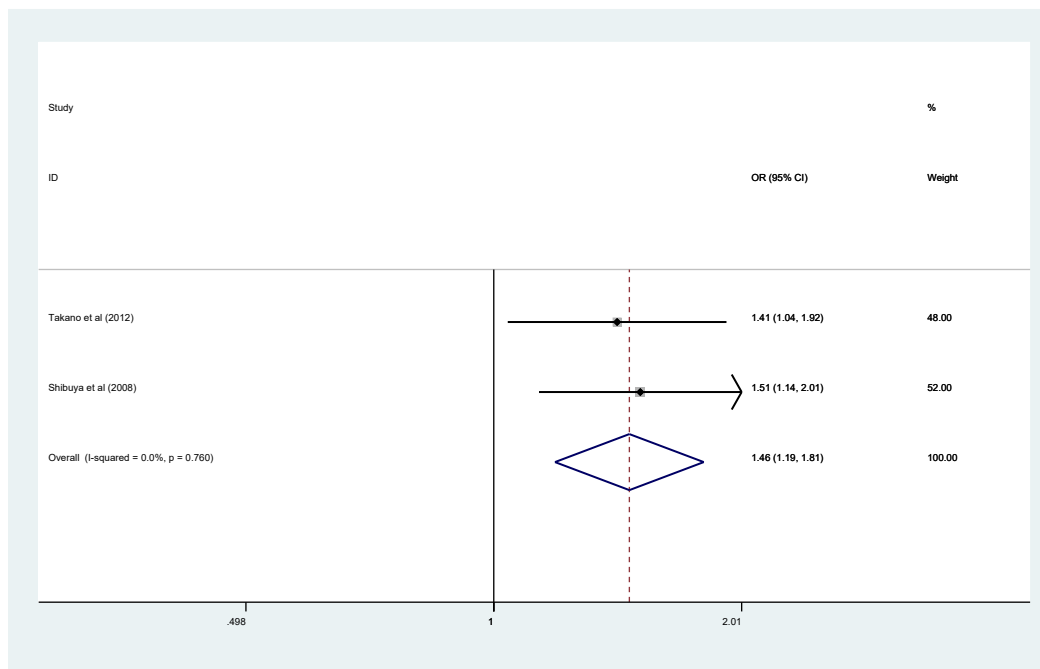

Forest plots demonstrating the significant association between *TLR4* (rs7037117) and NTG in allele (B vs A) model after one of the studies was excluded.

OR: odds ratio; CI: confidence interval; NTG: normal tension glaucoma.
