# Supplementary material for: Association of Gene Polymorphisms with Normal Tension Glaucoma: A Systematic Review and Meta-Analysis
Source: MDPI journal article supplement (doi:10.3390/genes15040491), 2024-04-14
Supplement: s1 [file Table S1.pdf › Table S1.pdf]

Table S1. Genotype frequencies for candidate SNPs in the involved studies.

| Gene                                                 |        | SNP                      | Minor Allele | Study (author& year)        | Genotype frequency |     |     |          |     |    | MAF   |          |
|------------------------------------------------------|--------|--------------------------|--------------|-----------------------------|--------------------|-----|-----|----------|-----|----|-------|----------|
|                                                      |        |                          |              |                             | cases              |     |     | controls |     |    |       |          |
| Name                                                 | Symbol |                          |              |                             | AA                 | AB  | BB  | AA       | AB  | BB | cases | controls |
| apolipoprotein E                                     | APOE   | -491A>T                  | T            | Lam et al., 2006            | 102                | 3   | 1   | 286      | 13  | 1  | 0.024 | 0.025    |
|                                                      |        |                          |              | Fan et al., 2005            | 102                | 3   | 1   | 267      | 13  | 1  | 0.024 | 0.027    |
|                                                      |        | -427T>C                  | C            | Lam et al., 2006            | 105                | 1   | 0   | 295      | 6   | 0  | 0.005 | 0.010    |
|                                                      |        |                          |              | Fan et al., 2005            | 105                | 1   | 0   | 276      | 5   | 0  | 0.005 | 0.009    |
|                                                      |        | -219T>G                  | G            | Lam et al., 2006            | 51                 | 41  | 14  | 130      | 145 | 25 | 0.325 | 0.325    |
|                                                      |        |                          |              | Fan et al., 2005            | 51                 | 41  | 14  | 118      | 139 | 24 | 0.325 | 0.333    |
| endothelin receptor type A                           | EDNRA  | c.-231G>A                | A            | Kosior-Jarecka et al., 2016 | 83                 | 6   | 71  | 81       | 15  | 69 | 0.463 | 0.464    |
|                                                      |        |                          |              | Kim et al., 2006            | 29                 | 32  | 6   | 44       | 39  | 17 | 0.328 | 0.365    |
|                                                      |        | c.*70C>G                 | G            | Kosior-Jarecka et al., 2016 | 27                 | 44  | 89  | 48       | 51  | 63 | 0.694 | 0.546    |
|                                                      |        |                          |              | Kim et al., 2006            | 15                 | 38  | 14  | 24       | 46  | 30 | 0.493 | 0.530    |
|                                                      |        | c.*1222C>T               | C            | Kosior-Jarecka et al., 2016 | 79                 | 24  | 56  | 71       | 39  | 55 | 0.428 | 0.452    |
|                                                      |        |                          |              | Kim et al., 2006            | 31                 | 26  | 10  | 49       | 46  | 5  | 0.343 | 0.280    |
| elongation of long-chain fatty acids family member 5 | ELOVL5 | rs735860                 | C            | Mabuchi et al., 2011        | 51                 | 84  | 23  | 71       | 89  | 31 | 0.411 | 0.395    |
|                                                      |        |                          |              | Meguro et al., 2010         | 51                 | 138 | 116 | 100      | 162 | 93 | 0.662 | 0.490    |
| hexokinase 2                                         | HK2    | rs678350                 | G            | Jung et al., 2019           | 70                 | 68  | 16  | 62       | 31  | 8  | 0.325 | 0.222    |
|                                                      |        |                          |              | Shi et al., 2013            | 133                | 113 | 40  | 161      | 89  | 21 | 0.337 | 0.257    |
| non-catalytic region of tyrosine kinase adaptor      | NCK2   | rs2033008                | A            | Jung et al., 2019           | 78                 | 62  | 14  | 44       | 41  | 16 | 0.292 | 0.361    |
|                                                      |        |                          |              | Shi et al., 2013            | 159                | 111 | 16  | 130      | 105 | 36 | 0.250 | 0.327    |
| 5,10-methylenetetrahydro-folate reductase            | MTHFR  | rs397507444, c.677 C/T   | T            | Clement et al., 2009        | 21                 | 11  | 2   | 25       | 14  | 3  | 0.221 | 0.238    |
|                                                      |        |                          |              | Woo et al., 2009            | 25                 | 34  | 19  | 31       | 50  | 19 | 0.462 | 0.443    |
|                                                      |        |                          |              | Mabuchi et al., 2006        | 54                 | 58  | 19  | 48       | 39  | 19 | 0.366 | 0.363    |
|                                                      |        | rs1217691063, c.1298 A/C | C            | Woo et al., 2009            | 57                 | 19  | 2   | 75       | 22  | 3  | 0.147 | 0.140    |
|                                                      |        |                          |              | Mabuchi et al., 2006        | 80                 | 51  | 0   | 61       | 44  | 1  | 0.195 | 0.217    |
|                                                      |        |                          |              |                             |                    |     |     |          |     |    |       |          |
| NO synthase 3                                        | NOS3   | rs1799983, 894 G>T       | T            | Jeoung et al., 2017         | 211                | 39  | 1   | 212      | 33  | 0  | 0.082 | 0.067    |
|                                                      |        |                          |              | Fan et al., 2010            | 82                 | 16  | 1   | 157      | 43  | 1  | 0.091 | 0.112    |
|                                                      |        | rs2070744, -786T>C       | C            | Jeoung et al., 2017         | 196                | 52  | 3   | 196      | 49  | 0  | 0.116 | 0.100    |
|                                                      |        |                          |              | Fan et al., 2010            | 81                 | 16  | 2   | 157      | 40  | 4  | 0.101 | 0.119    |
| Optic atrophy 1                                      | OPA1   | rs166850, IVS8+4C↪T      | T            | Milanowski et al., 2021     | 121                | 70  | 0   | 168      | 79  | 6  | 0.183 | 0.180    |
|                                                      |        |                          |              | Yu-Wai-Man et al., 2010     | 41                 | 26  | 3   | 59       | 13  | 3  | 0.021 | 0.127    |

| Gene              |        | SNP                    | Minor Allele | Study (author& year)         | Genotype frequency |    |    |          |     |    | MAF   |          |
|-------------------|--------|------------------------|--------------|------------------------------|--------------------|----|----|----------|-----|----|-------|----------|
|                   |        |                        |              |                              | cases              |    |    | controls |     |    |       |          |
| Name              | Symbol |                        |              |                              | AA                 | AB | BB | AA       | AB  | BB | cases | controls |
| optineurin        | OPTN   | rs10451941, IVS8+32T→C | C            | Fan et al., 2010             | 89                 | 9  | 1  | 173      | 27  | 1  | 0.056 | 0.072    |
|                   |        |                        |              | Mabuchi et al., 2007         | 190                | 4  | 0  | 182      | 3   | 0  | 0.010 | 0.008    |
|                   |        |                        |              | Yao et al., 2006             | 58                 | 3  | 0  | 46       | 2   | 0  | 0.025 | 0.021    |
|                   |        |                        |              | Woo et al., 2004             | 62                 | 3  | 0  | 101      | 0   | 0  | 0.023 | 0.000    |
|                   |        |                        |              | Powell et al., 2003          | 41                 | 16 | 4  | 111      | 53  | 4  | 0.197 | 0.182    |
|                   |        |                        |              | Aung et al., 2002 (cohort 1) | 57                 | 26 | 0  | 86       | 14  | 0  | 0.157 | 0.070    |
|                   |        |                        |              | Aung et al., 2002 (cohort 2) | 56                 | 24 | 0  | 77       | 9   | 0  | 0.150 | 0.052    |
|                   |        |                        |              | Milanowski et al., 2021      | 59                 | 97 | 75 | 98       | 110 | 48 | 0.535 | 0.402    |
|                   |        |                        |              | Yu-Wai-Man et al., 2014      | 11                 | 37 | 22 | 21       | 37  | 17 | 0.579 | 0.473    |
|                   |        |                        |              | Fan et al., 2010             | 38                 | 49 | 12 | 74       | 104 | 23 | 0.369 | 0.373    |
|                   |        |                        |              | Mabuchi et al., 2007         | 125                | 63 | 6  | 146      | 35  | 4  | 0.193 | 0.116    |
|                   |        |                        |              | Yao et al., 2006             | 14                 | 30 | 17 | 16       | 26  | 6  | 0.525 | 0.396    |
|                   |        |                        |              | Woo et al., 2004             | 40                 | 18 | 7  | 68       | 29  | 4  | 0.246 | 0.183    |
|                   |        |                        |              | Powell et al., 2003          | 17                 | 27 | 17 | 43       | 104 | 21 | 0.500 | 0.435    |
|                   |        |                        |              | Aung et al., 2002 (cohort 1) | 47                 | 36 | 0  | 72       | 28  | 0  | 0.217 | 0.140    |
|                   |        |                        |              | Aung et al., 2002 (cohort 2) | 41                 | 39 | 0  | 55       | 31  | 0  | 0.244 | 0.180    |
|                   |        | c.603T>A, Met98Lys     | A            | Fan et al., 2005             | 67                 | 36 | 3  | 200      | 74  | 7  | 0.198 | 0.157    |
|                   |        |                        |              | Funayama et al., 2004        | 169                | 43 | 5  | 182      | 35  | 1  | 0.122 | 0.085    |
|                   |        |                        |              | Fuse et al., 2004            | 55                 | 9  | 1  | 95       | 5   | 0  | 0.085 | 0.025    |
|                   |        | c.412G>A, Thr34Thr     | A            | Fan et al., 2005             | 66                 | 34 | 6  | 222      | 57  | 2  | 0.217 | 0.109    |
|                   |        |                        |              | Funayama et al., 2004        | 148                | 62 | 7  | 166      | 50  | 2  | 0.175 | 0.124    |
|                   |        |                        |              | Fuse et al., 2004            | 37                 | 27 | 1  | 65       | 33  | 2  | 0.223 | 0.185    |
|                   |        | IVS6-5T>C              | C            | Fan et al., 2005             | 80                 | 20 | 6  | 229      | 48  | 4  | 0.151 | 0.091    |
|                   |        |                        |              | Fuse et al., 2004            | 38                 | 23 | 4  | 52       | 42  | 6  | 0.246 | 0.270    |
|                   |        | IVS6-10G>A             | A            | Fan et al., 2005             | 92                 | 14 | 0  | 256      | 25  | 0  | 0.066 | 0.044    |
|                   |        |                        |              | Fuse et al., 2004            | 54                 | 10 | 1  | 84       | 15  | 1  | 0.092 | 0.085    |
|                   |        | IVS7+24G>A             | A            | Fan et al., 2005             | 91                 | 15 | 0  | 258      | 22  | 1  | 0.071 | 0.043    |
|                   |        |                        |              | Fuse et al., 2004            | 53                 | 9  | 3  | 79       | 20  | 1  | 0.154 | 0.150    |
| tumor protein p53 | p53    | rs1042522, -Arg72Pro   | C            | Wiggs et al., 2012           | 25                 | 29 | 10 | 198      | 183 | 19 | 0.383 | 0.276    |
|                   |        |                        |              | Fan et al.,2010              | 34                 | 43 | 22 | 38       | 108 | 55 | 0.439 | 0.542    |
|                   |        |                        |              | Daugherty et al., 2009       | 36                 | 15 | 1  | 82       | 72  | 13 | 0.163 | 0.293    |

| Gene                    |        | SNP                  | Minor Allele | Study (author& year) | Genotype frequency      |                     |                  |          |     |       | MAF   |          |       |       |
|-------------------------|--------|----------------------|--------------|----------------------|-------------------------|---------------------|------------------|----------|-----|-------|-------|----------|-------|-------|
|                         |        |                      |              |                      | cases                   |                     |                  | controls |     |       |       |          |       |       |
| Name                    | Symbol |                      |              |                      | AA                      | AB                  | BB               | AA       | AB  | BB    | cases | controls |       |       |
| S1 RNA binding domain 1 | SRBD1  | rs3213787            | G            | Mabuchi et al., 2009 | 92                      | 95                  | 26               | 83       | 83  | 23    | 0.345 | 0.341    |       |       |
|                         |        |                      |              | Dimasi et al., 2005  | 29                      | 28                  | 5                | 109      | 57  | 12    | 0.306 | 0.228    |       |       |
|                         |        |                      |              | Jung et al., 2020    | 260                     | 44                  | 1                | 241      | 96  | 18    | 0.129 | 0.189    |       |       |
|                         |        |                      |              | Mabuchi et al., 2011 | 122                     | 33                  | 4                | 68       | 31  | 4     | 0.016 | 0.073    |       |       |
|                         |        |                      |              | Meguro et al., 2010  | 154                     | 3                   | 1                | 164      | 26  | 1     | 0.075 | 0.188    |       |       |
| Toll-like receptor 4    | TLR4   | rs10759930           | C            | TAKANO et al., 2012  | 141                     | 159                 | 65               | 103      | 85  | 28    | 0.396 | 0.326    |       |       |
|                         |        |                      |              | Suh et al., 2011     | 52                      | 72                  | 23               | 126      | 191 | 63    | 0.401 | 0.415    |       |       |
|                         |        |                      |              | Shibuya et al., 2008 | 81                      | 127                 | 42               | 137      | 141 | 40    | 0.422 | 0.347    |       |       |
|                         |        |                      |              | rs1927914            | G                       | TAKANO et al., 2012 | 137              | 164      | 64  | 105   | 82    | 29       | 0.456 | 0.324 |
|                         |        |                      |              | Suh et al., 2011     |                         | 52                  | 72               | 23       | 126 | 192   | 62    | 0.388    | 0.415 |       |
|                         |        | Shibuya et al., 2008 | 82           | 126                  |                         | 42                  | 137              | 141      | 40  | 0.420 | 0.347 |          |       |       |
|                         |        | rs1927911            | A            | TAKANO et al., 2012  |                         | 139                 | 166              | 60       | 106 | 85    | 25    | 0.392    | 0.254 |       |
|                         |        | Suh et al., 2011     |              | 53                   | 71                      | 23                  | 129              | 190      | 61  | 0.398 | 0.411 |          |       |       |
|                         |        | Shibuya et al., 2008 |              | 87                   | 122                     | 41                  | 141              | 135      | 42  | 0.408 | 0.344 |          |       |       |
|                         |        | rs12377632           |              | T                    | TAKANO et al., 2012     | 137                 | 190              | 38       | 104 | 87    | 25    | 0.364    | 0.317 |       |
|                         |        | Suh et al., 2011     | 54           |                      | 70                      | 23                  | 127              | 191      | 62  | 0.395 | 0.414 |          |       |       |
|                         |        | Shibuya et al., 2008 | 86           |                      | 122                     | 42                  | 140              | 138      | 40  | 0.412 | 0.343 |          |       |       |
|                         |        | rs2149356            | T            |                      | TAKANO et al., 2012     | 139                 | 164              | 62       | 107 | 85    | 24    | 0.395    | 0.291 |       |
|                         |        | Suh et al., 2011     |              | 54                   | 70                      | 23                  | 128              | 191      | 61  | 0.395 | 0.412 |          |       |       |
|                         |        | Shibuya et al., 2008 |              | 87                   | 122                     | 41                  | 140              | 138      | 40  | 0.408 | 0.343 |          |       |       |
|                         |        | rs11536889           |              | C                    | TAKANO et al., 2012     | 196                 | 145              | 24       | 127 | 76    | 13    | 0.264    | 0.238 |       |
|                         |        | Suh et al., 2011     | 77           |                      | 62                      | 8                   | 221              | 139      | 20  | 0.265 | 0.236 |          |       |       |
|                         |        | Shibuya et al., 2008 | 146          |                      | 93                      | 11                  | 177              | 119      | 22  | 0.235 | 0.256 |          |       |       |
|                         |        | rs7037117            | G            |                      | TAKANO et al., 2012     | 222                 | 125              | 18       | 153 | 54    | 9     | 0.221    | 0.167 |       |
|                         |        | Suh et al., 2011     |              | 85                   | 51                      | 11                  | 211              | 143      | 26  | 0.185 | 0.257 |          |       |       |
|                         |        | Shibuya et al., 2008 |              | 138                  | 98                      | 14                  | 213              | 94       | 11  | 0.252 | 0.182 |          |       |       |
|                         |        | rs7045953            |              | G                    | TAKANO et al., 2012     | 313                 | 50               | 2        | 191 | 24    | 1     | 0.074    | 0.060 |       |
|                         |        | Suh et al., 2011     | 126          |                      | 19                      | 2                   | 314              | 60       | 6   | 0.078 | 0.095 |          |       |       |
|                         |        | Shibuya et al., 2008 | 203          |                      | 45                      | 2                   | 269              | 49       | 0   | 0.098 | 0.077 |          |       |       |
|                         |        | WD repeat domain 36  | WDR36        |                      | rs17553936, IVS16-30A>G | G                   | Fan et al., 2009 | 27       | 13  | 2     | 47    | 27       | 3     | 0.202 |
| Miyazawa et al., 2007   | 76     |                      |              | 25                   |                         |                     | 2                | 72       | 41  | 5     | 0.141 | 0.216    |       |       |

| Gene                                                           |           | SNP        | Minor Allele | Study (author& year) | Genotype frequency |    |    |          |     |    | MAF   |          |
|----------------------------------------------------------------|-----------|------------|--------------|----------------------|--------------------|----|----|----------|-----|----|-------|----------|
|                                                                |           |            |              |                      | cases              |    |    | controls |     |    |       |          |
| Name                                                           | Symbol    |            |              |                      | AA                 | AB | BB | AA       | AB  | BB | cases | controls |
| sine oculis homeobox homolog 1- sine oculis homeobox homolog 6 | SLX1-SLX6 | rs10483727 | C            | Shin et al., 2022    | 129                | 77 | 4  | 64       | 42  | 11 | 0.202 | 0.274    |
|                                                                |           |            |              | Sang et al., 2016    | 131                | 45 | 5  | 140      | 103 | 23 | 0.152 | 0.280    |
|                                                                |           | rs33912345 | A            | Shin et al., 2022    | 130                | 76 | 4  | 64       | 45  | 8  | 0.200 | 0.261    |
|                                                                |           |            |              | Sang et al., 2016    | 132                | 45 | 4  | 141      | 101 | 24 | 0.146 | 0.280    |

SNP: single nucleotide polymorphism; MAF: minor allele frequency.
