# Supplementary material for: Association of Gene Polymorphisms with Normal Tension Glaucoma: A Systematic Review and Meta-Analysis
Source: MDPI journal article supplement (doi:10.3390/genes15040491), 2024-04-14
Supplement: s1 [file Table S2.pdf › Table S2.pdf]

Table S2. Genetic associations of NTG in different ethnicities.

| No.          | Gene | SNP   | Genetic model | Pooled sample size |          | Fixed or random effect model* |                         | Heterogeneity test |                           |       |
|--------------|------|-------|---------------|--------------------|----------|-------------------------------|-------------------------|--------------------|---------------------------|-------|
|              |      |       |               | cases              | controls | OR (95%CI)                    | <i>p</i>                | <i>p</i> (Q)       | <i>I</i> <sup>2</sup> (%) |       |
| Asian        | 1    | MTHFR | rs397507444   | B vs. A            | 209      | 206                           | 1.04 (0.79-1.38)        | 0.772              | 0.830                     | 0.0   |
|              |      |       |               | BB+AB vs. AA       | 209      | 206                           | 1.08 (0.73-1.62)        | 0.694              | 0.609                     | 0.0   |
|              |      |       |               | BB vs. AA+AB       | 209      | 206                           | 1.02 (0.62-1.68)        | 0.930              | 0.264                     | 19.8  |
|              |      |       |               | AB vs. AA          | 209      | 206                           | 1.10 (0.72-1.70)        | 0.658              | 0.319                     | 0.0   |
|              |      |       |               | BB vs. AA          | 209      | 206                           | 1.03 (0.59-1.79)        | 0.911              | 0.558                     | 0.0   |
|              | 2    | OPAI  | rs166850      | B vs. A            | 358      | 487                           | 1.01 (0.56-1.84)        | 0.964              | 0.199                     | 38.0  |
|              |      |       |               | BB+AB vs. AA       | 358      | 487                           | 0.98 (0.53-1.83)        | 0.951              | 0.174                     | 42.8  |
|              |      |       |               | BB vs. AA+AB       | 99       | 201                           | 2.04 (0.13-32.97)       | 0.615              | NA                        | 0.0   |
|              |      |       |               | AB vs. AA          | 358      | 487                           | 0.95 (0.50-1.80)        | 0.873              | 0.157                     | 45.9  |
|              |      |       |               | BB vs. AA          | 99       | 201                           | 1.94 (0.12-31.44)       | 0.640              | NA                        | 100.0 |
|              | 3    | OPAI  | rs10451941    | B vs. A            | 358      | 487                           | 1.36 (0.91-2.02)        | 0.136              | 0.071                     | 62.1  |
|              |      |       |               | BB+AB vs. AA       | 358      | 487                           | 1.37 (0.83-2.26)        | 0.217              | 0.069                     | 62.7  |
|              |      |       |               | BB vs. AA+AB       | 358      | 487                           | 1.40 (0.80-2.46)        | 0.241              | 0.405                     | 0.0   |
|              |      |       |               | AB vs. AA          | 358      | 487                           | 1.30 (0.74-2.26)        | 0.360              | 0.052                     | 66.2  |
|              |      |       |               | BB vs. AA          | 358      | 487                           | 1.45 (0.81-2.61)        | 0.215              | 0.361                     | 1.8   |
|              | 4    | p53   | rs1042522     | B vs. A            | 312      | 390                           | 0.83 (0.54-1.26)        | 0.380              | 0.061                     | 71.5  |
| BB+AB vs. AA |      |       |               | 312                | 390      | 0.98 (0.71-1.34)              | 0.894                   | 0.518              | 0.0                       |       |
| BB vs. AA+AB |      |       |               | 312                | 390      | 0.86 (0.57-1.30)              | 0.484                   | 0.505              | 0.0                       |       |
| AB vs. AA    |      |       |               | 312                | 390      | 0.70 (0.31-1.58)              | 0.387                   | 0.021              | 81.1                      |       |
| BB vs. AA    |      |       |               | 312                | 390      | 0.68 (0.30-1.53)              | 0.352                   | 0.082              | 67.0                      |       |
| Caucasian    | 1    | OPAI  | rs166850      | B vs. A            | 485      | 682                           | <b>1.65 (1.06-2.57)</b> | <b>0.026</b>       | 0.016                     | 67.1  |
|              |      |       |               | BB+AB vs. AA       | 485      | 682                           | <b>2.39 (1.15-4.96)</b> | <b>0.019</b>       | 0.000                     | 84.8  |
|              |      |       |               | BB vs. AA+AB       | 322      | 496                           | 0.97 (0.18-5.21)        | 0.967              | 0.087                     | 59.0  |
|              |      |       |               | AB vs. AA          | 485      | 682                           | <b>2.21 (1.09-4.46)</b> | <b>0.027</b>       | 0.000                     | 82.2  |
|              |      |       |               | BB vs. AA          | 322      | 496                           | 1.09 (0.22-5.47)        | 0.916              | 0.109                     | 54.8  |
|              | 2    | OPAI  | rs10451941    | B vs. A            | 525      | 685                           | <b>1.57 (1.32-1.87)</b> | <b>0.000</b>       | 0.852                     | 0.0   |
|              |      |       |               | BB+AB vs. AA       | 525      | 685                           | <b>1.66 (1.29-2.13)</b> | <b>0.000</b>       | 0.376                     | 5.3   |
|              |      |       |               | BB vs. AA+AB       | 362      | 499                           | <b>2.04 (1.47-2.82)</b> | <b>0.000</b>       | 0.500                     | 0.0   |
|              |      |       |               | AB vs. AA          | 525      | 685                           | <b>1.46 (1.12-1.90)</b> | <b>0.005</b>       | 0.168                     | 38.0  |
|              |      |       |               | BB vs. AA          | 362      | 499                           | <b>2.45 (1.67-3.61)</b> | <b>0.000</b>       | 0.894                     | 0.0   |

| No. | Gene       | SNP       | Genetic model | Pooled sample size |          | Fixed or random effect model* |              | Heterogeneity test |                           |
|-----|------------|-----------|---------------|--------------------|----------|-------------------------------|--------------|--------------------|---------------------------|
|     |            |           |               | cases              | controls | OR (95%CI)                    | <i>p</i>     | <i>p</i> (Q)       | <i>I</i> <sup>2</sup> (%) |
| 3   | <i>p53</i> | rs1042522 | B vs. A       | 178                | 745      | 1.07 (0.53-2.17)              | 0.842        | 0.001              | 85.4                      |
|     |            |           | BB+AB vs. AA  | 178                | 745      | <b>4.10 (1.96-8.59)</b>       | <b>0.000</b> | 0.001              | 85.2                      |
|     |            |           | BB vs. AA+AB  | 178                | 745      | 1.30 (0.32-5.26)              | 0.716        | 0.019              | 74.8                      |
|     |            |           | AB vs. AA     | 178                | 745      | 1.05 (0.49-2.22)              | 0.903        | 0.012              | 77.4                      |
|     |            |           | BB vs. AA     | 178                | 745      | 1.33 (0.28-6.31)              | 0.719        | 0.010              | 78.2                      |

\* If *p* (Q) was  $\geq 0.05$  and  $I^2$  value  $< 50\%$ , the fixed-effect model was chosen, otherwise a random-effect model was used.

NTG: normal tension glaucoma; SNP: single nucleotide polymorphism; OR: odds ratio; CI: confidence interval; *MTHFR*: 5,10-methylenetetrahydro-folate reductase; *OPAI*: Optic atrophy 1.
